# Supplementary material for: GenAI synthesis of histopathological images from Raman imaging for intraoperative tongue squamous cell carcinoma assessment
Source: Springer Nature journal article supplement (doi:10.1038/s41368-025-00346-y), 2025-01-26
Supplement: MOESM1 [file 41368_2025_346_MOESM1_ESM.pdf]

## Supplementary Figures

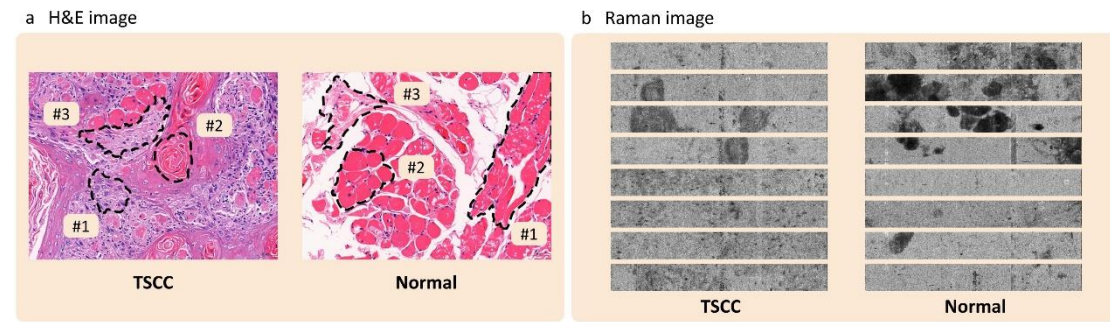

**Supplementary Fig 1: H&E images and Raman images generated by histopathological imaging and Raman imaging, respectively.** a Histopathological characteristics in H&E images. Left Panel: Significant histopathological features of TSCC observed in H&E images include pleomorphism of squamous cells (#1), formation of keratin pearls (#2), and invasion of cancer cells into surrounding connective tissue (#3). Right Panel: H&E images of normal tissue reveal major characteristics such as tongue muscle cells with a striated (striped) structure (#1), multiple nuclei positioned at the periphery of the cell (#2), and connective tissue (#3). b Raman images of TSCC and normal tissues. It posed a challenge to discern clear histopathological characteristics from these images.

a Overview of AI transition model development

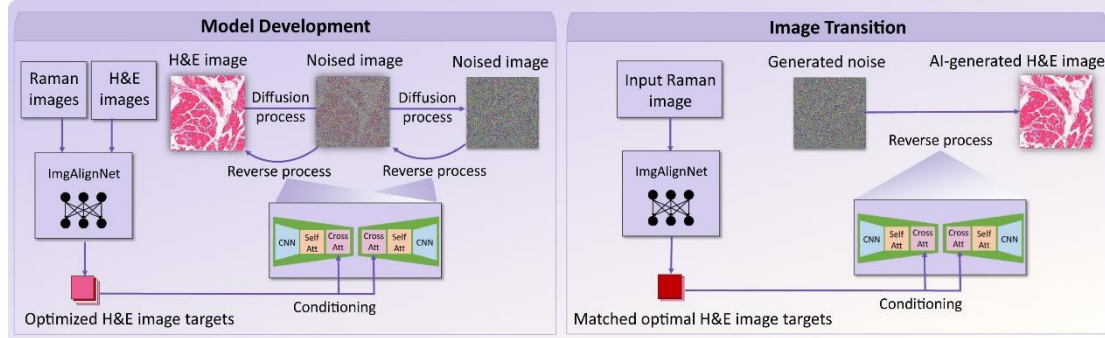

b Details in ImgAlignNet and diffusion process

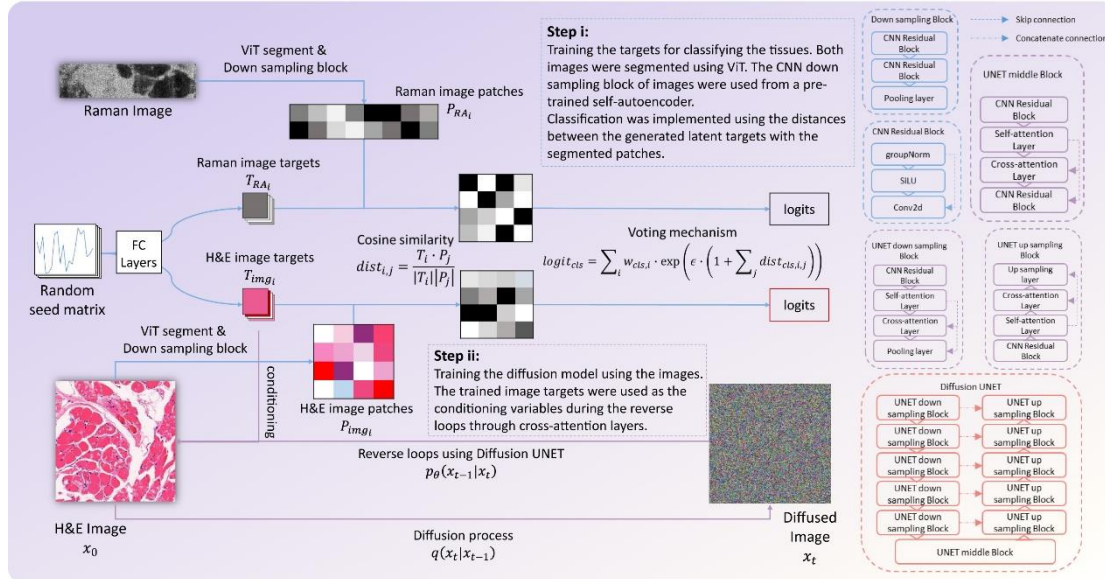

**Supplementary Fig 2: Overview and Detailed Processes of AI Transformation Model.**

a Overview of the AI transformation model. In the model development phase (left panel), ImgAlignNet underwent training utilizing both Raman and H&E images. Specifically, ImgAlignNet was trained to align Raman images with H&E images. The H&E targets was pre-trained (optimized) for conditioning in the reverse process of the diffusion model training. In the subsequent application of the model for image transformation (right panel), the input Raman image underwent alignment with the pre-trained (optimized) H&E targets. These optimized targets were then utilized as conditioning to guide the diffusion model in generating an H&E image.

b Details in ImgAlignNet and diffusion processes. Within the detailed processes, both Raman and H&E images were separately segmented and down-sampled into patches. Fully Connected (FC) layers were trained to generate optimized targets. These targets were strategically designed to exhibit the largest cosine similarity with corresponding patches and the highest accuracy in classifying TSCC and normal tissues. Subsequently,

the pre-trained (optimized) targets, known as H&E targets, played a crucial role as conditioning in the reverse process of developing the diffusion model.

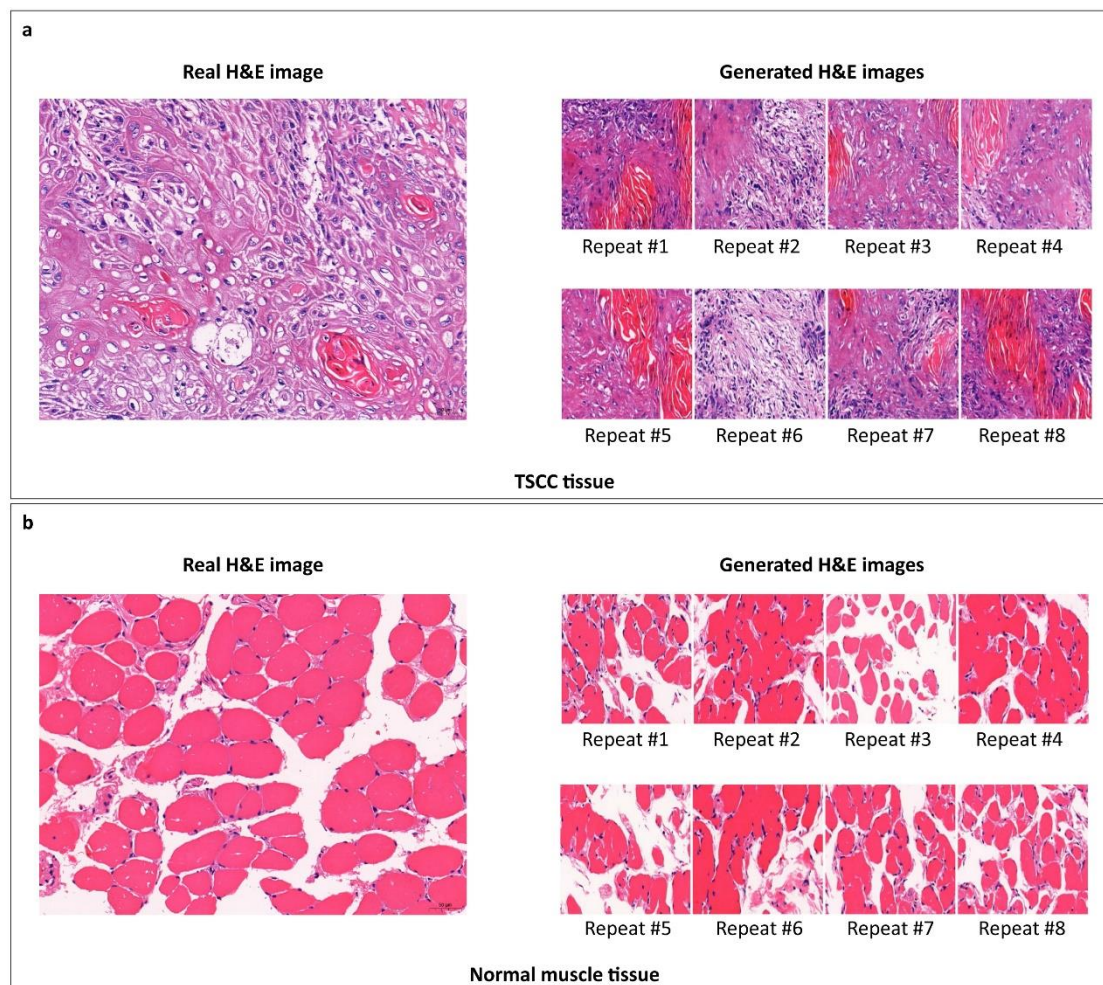

**Supplementary Fig 3: Generated H&E Images from Raman Images of TSCC and Normal Tissues.** Using the AI transformation model, we transformed the Raman images of TSCC and normal tissues into corresponding H&E images. As the generated images from the diffusion model slightly differ each time, we ran the model eight times for each tissue type, resulting in eight distinct H&E images. **a** Raman image and generated images of TSCC. From the generated images of TSCC tissue, the histopathological features essential for clinical diagnosis are clearly observed, including the pleomorphism of squamous cells, the formation of keratin pearls, and the invasion of cancer cells into the surrounding connective tissue. **b** Raman image and generated images of normal tissue. Similarly, in the generated images of normal tissue, the striped structure of tongue muscle cells, multiple nuclei, and connective tissue are distinctly visible.

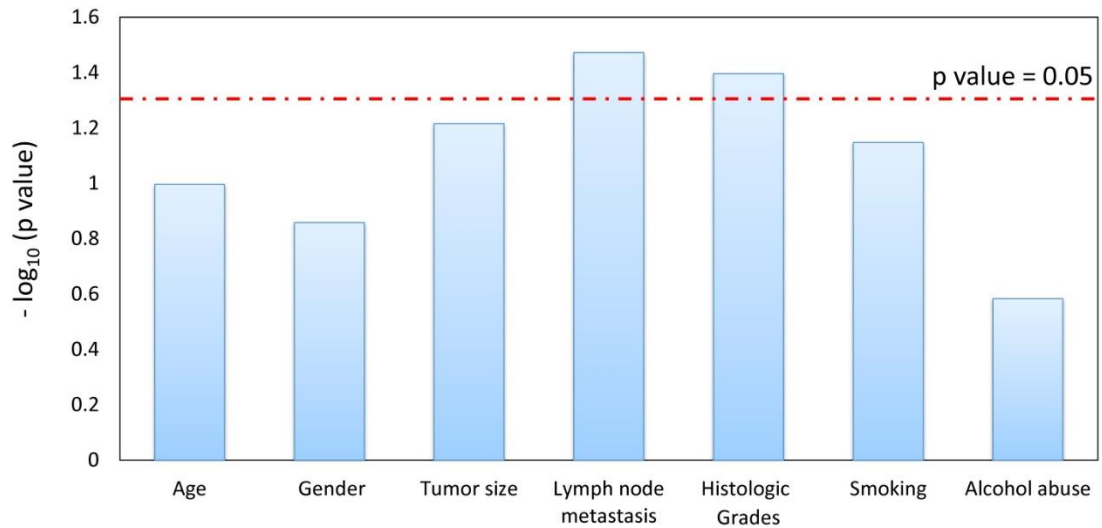

**Supplementary Fig 4: Results of univariate analysis of variance on the discriminability of the generated H&E Images of TSCC by the model across various clinical indicators.** The discriminability of model-generated H&E images varies significantly among TSCC samples with different lymph node metastasis and histologic grades, as well as across various clinical indicators including age, gender, smoking history and alcohol abuse.



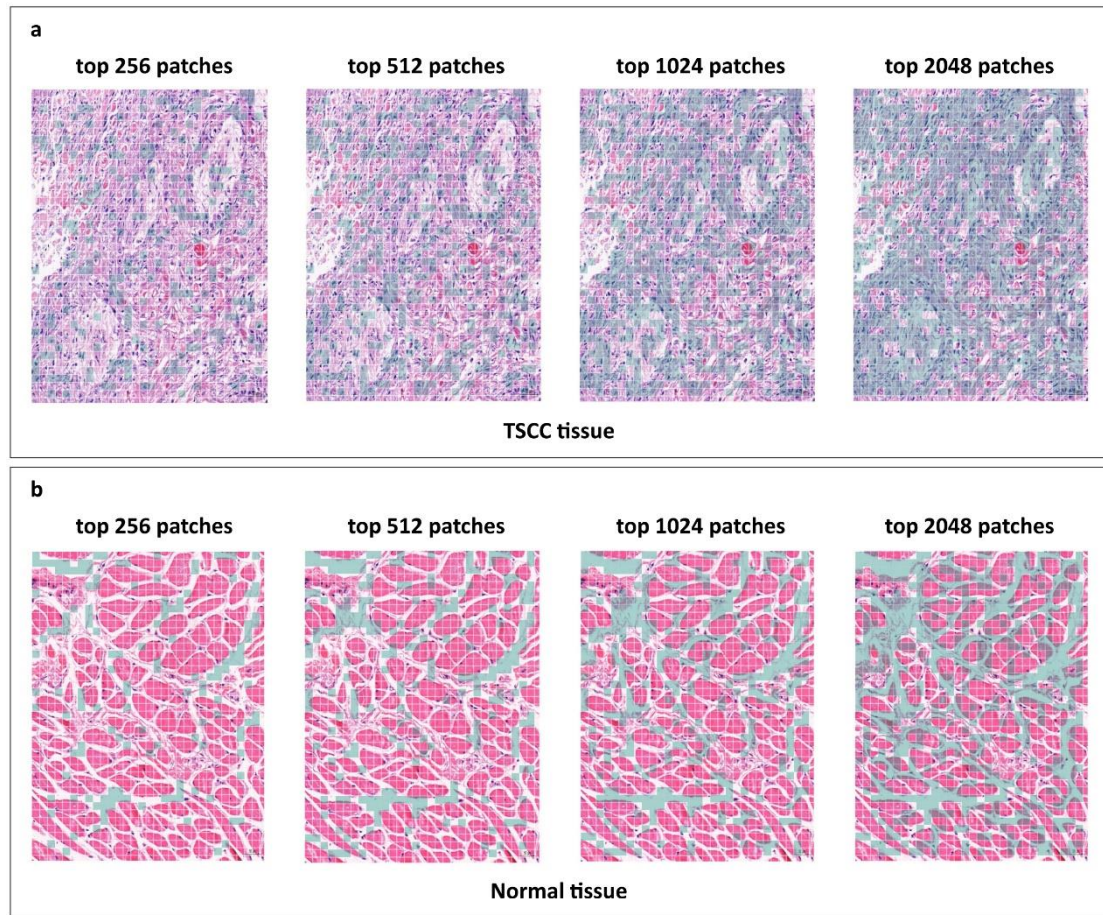

**Supplementary Fig 5: Spatial Characteristics Represented by Pre-Trained H&E Targets in the Application of the Diffusion Model for H&E Image Generation.** Pre-trained H&E targets serve as conditioning in the diffusion model to guide the generation of H&E images. We paired the pre-trained H&E targets with H&E patches, creating target-patch pairs for computing cosine similarity within each pair. Subsequently, all pairs were ranked based on their cosine similarities in descending order. The top  $n$  patches were then selected to assess the coverage of the real H&E image. a The coverage analysis of the top 256, 512, 1024, and 2018 patches in TSCC tissue. b The coverage analysis of the top 256, 512, 1024, and 2018 patches in normal tissue. The figure clearly exhibits the spatial characteristics captured by the pre-trained H&E targets, providing insights into the effectiveness of the diffusion model in generating H&E images with desired spatial features.

## Supplementary Methods: Pseudo codes for the details of model implementation

For enhanced clarity regarding the models employed in this study, we provide pseudo code outlining the entire generation process. Given that the original code is written in Python, we've reformatted it into a process-oriented style to improve readability. In this presentation, Python's keywords, such as 'if', 'for', and 'return', are highlighted in green for easy identification. Comments are marked in blue, and functions are distinguished in orange. Variables holding multiple values are presented in **bold** for emphasis. The subscripts  $i, j, k$  and  $cls$  denote dimensions, whereas other notations specify attributes, like  $HE$  for H&E images and  $RA$  for Raman images.

Notably, as the implementation utilizes PyTorch, functions highlighted in orange but absent from the pseudo code refer to PyTorch's built-in functionalities.

---

### Algorithm 1 *ImgAlignNet forward*

---

```
def forward(ImgHEcls, ImgRAcls, seedcls,k, wHEcls,k, wRAcls,k,  $\lambda_{HE}$ ,  $\lambda_{RA}$ , segPadding, segStride):  
    ##Parameters:  
    img: the tensor of a image  
    cls: the class in {TSCC, Normal}  
    HE: H&E image  
    RA: Raman image  
     $\lambda, w$ : trainable parameters  
    segPadding, segStride: The parameters for segmentation  
    ##Calculating and segmenting the patches  
    1: {PatchHEcls,i} = segImg(ImgHEcls, segPadding, segStride)  
    2: {PatchRAcls,j} = segImg(ImgRAcls, segPadding, segStride)  
    ##Generating targets  
    3: {TargetHEcls,k}, {TargetRAcls,k} = FCS(seedcls,k)  
    ##Computing the logits  
    4: LogitsHEcls =  $\sum_k |w_{HE_{cls,k}}| \sum_i \exp(|\lambda_{HE}| (\text{cosSimilarity}(\text{Target}_{HE_{cls,k}}, \text{Patch}_{HE_{cls,i}}) + 1))$   
    5: LogitsRAcls =  $\sum_k |w_{RA_{cls,k}}| \sum_j \exp(|\lambda_{RA}| (\text{cosSimilarity}(\text{Target}_{RA_{cls,k}}, \text{Patch}_{RA_{cls,j}}) + 1))$   
    ##Computing loss value using cross entropy  
    6: Loss = CE(softmaxcls(LogitsRA), cls) + CE(softmaxcls(LogitsHE), cls)  
    return Loss, {TargetHEcls,k}, {TargetRAcls,k}
```

---

---

**Algorithm 2** *ImgAlignModel segment image*

---

```
def segImg(img, segPadding, segStride):  
    ##Parameters:  
    img: the tensor of a image  
    segPadding, segStride: The parameters for segmentation  
    ##Downsampling the image  
    1: img = CNNDownSampling(img)  
    ##Segmenting the image  
    2: {Patchi} = unfold(img, segPadding, segStride)  
    ##Adjust the dimension for every patch using a fully connected layer  
    3: Patchi = FC(Patchi)  
    ##Normalizing  
    4: Patchi = normalize( $p = 2$ )  
    return {Patchi}
```

---

---

**Algorithm 3** *CNN down sampling block*

---

```
def CNNDownSampling(x,  $N_{iter} = 2$ ):  
    ##Parameters:  
    x: the input tensor  
     $N_{iter}$ : the number of iteration  
    ##Initial convolution  
    1: x = Conv2d(x, kernelSize = 1)  
    2: for  $n \in \{1 \dots N_{iter}\}$ :  
    3:   x = resBlock(x)  
    ##The down operation is processed by Conv2d  
    4:   x = Conv2d(x, kernelSize = 3, stride = 2, padding = 1)  
    5:   x = resBlock(x)  
    return x
```

---

---

**Algorithm 4** *residule block*

---

```
def resBlock(x):  
    ##Parameters:  
    x: the input tensor  
    ##The two convolution layers below uses kernelSize = 3, stride = 1, padding = 1  
    1: h = Conv2d(SiLU(GroupNorm(x)))  
    2: h = Conv2d(Dropout(SiLU(GroupNorm(h))))  
    ##Ensure the number of channels of shortcut is the same  
    3: if  $\dim(\mathbf{h}) \neq \dim(\mathbf{x})$ :  
    ##The convolution layer below uses kernelSize = 1  
    x = Conv2d(x)  
    return h + x
```

---



---

**Algorithm 5** the full connection layers for generating targets

---

```
def FCs(seed, Niter = 2):  
    ##Parameters:  
    seed: the seed tensor generated from a standard normal distribution  
    Niter: the number of iteration  
    1: TargetHE = FC(x)  
    2: TargetRA = FC(x)  
    3: for n ∈ {1 ... Niter}:  
    4: TargetHE = FC(SiLU(LayerNorm(TargetHE)))  
    5: TargetRA = FC(SiLU(LayerNorm(TargetRA)))  
    return TargetHE, TargetRA
```

---

---

**Algorithm 6** Diffusion Model training process

---

```
def fit(ImgHEcls, {TargetHEcls,k}):  
    ##Parameters:  
    img: the tensor of a image  
    Target: the optimized parameter from ImgAlignNet  
    cls: the class in {TSCC, Normal}  
    HE: H&E image  
    ##Generating noise from a standard normal distribution  
    1: noise = randn_like(ImgHEcls)  
    ##Adding noise, also called q sampling process: q(xt|x0)  
    2: Img'HEcls, t = qSample(ImgHEcls, noise)  
    ##Using UNet for fitting the noise  
    3: recnoise = diffusionUNet(Img'HEcls, t, {TargetHEcls,k})  
    4: Loss = MSE(noise, recnoise)  
    return Loss
```

---

---

**Algorithm 7** Diffusion Model inference process

---

```
def inference(ImgRA, shapeimg):  
    ##Parameters:  
    img: the tensor of a image  
    shape: the shape of the image to generate  
    RA: Raman image  
    ##Generating the conditioning  
    1: {condk} = calcCond(ImgRAcls)  
    ##Generating noise from a standard normal distribution  
    2: noise = randn(shapeimg)  
    ##The reverse loop, also called p sampling process p(xt-1|xt)  
    3: rec = pSample(noise, {condk})  
    return rec
```

---

---

**Algorithm 8** The  $q$  sampling process

---

```
def qSample( $\mathbf{Img}_{HE_{cls}}$ ,  $\mathbf{noise}$ ,  $t_{Num} = 1000$ ,  $\beta_{init} = [0.0001, 0.02]$ ):  
    ##Parameters:  
     $\mathbf{img}$ : the tensor of a image  
     $cls$ : the class in  $\{TSCC, Normal\}$   
     $HE$ : H&E image  
     $\mathbf{noise}$ : the noise from  $N(0,1)$  with the same shape of  $\mathbf{img}$   
     $t_{Num}$ : the number of diffusion steps  
     $\beta_{init}$ : a hyper parameter contain the start and end value of  $\beta$   
    ##Randomly generate a step with in  $t_{Num}$   
    1:  $t = \text{randint}(0, t_{Num})$   
    ##Abstracting necessary parameter  
    2:  $\tilde{\alpha}_t = \text{calcAlphaCumprod}(t, t_{Num}, \beta_{init})$   
    ##Adding the noise  
    3:  $\mathbf{Img}'_{HE_{cls}} = \sqrt{\tilde{\alpha}_t} \mathbf{Img}_{HE_{cls}} + \sqrt{1 - \tilde{\alpha}_t} \mathbf{noise}$   
    return Loss
```

---

---

**Algorithm 9** Calculating cumulative product of  $\alpha$ 

---

```
def calcAlphaCumprod( $t$ ,  $t_{Num} = 1000$ ,  $\beta_{init} = [0.0001, 0.02]$ ):  
    ##Parameters:  
     $t$ : a time step  
     $t_{Num}$ : the number of diffusion steps  
     $\beta_{init}$ : a hyper parameter contain the start and end value of  $\beta$   
    ##Generating  $\beta$  using linear schedule  
    1:  $\beta_{start}, \beta_{end} = \beta_{init}$   
    2:  $\beta = \text{linspace}(\beta_{start}, \beta_{end}, t_{Num})$   
    ##Computing  $\alpha$  and  $\tilde{\alpha}$ , generally they are global values  
    3:  $\alpha = 1 - \beta$   
    4:  $\tilde{\alpha} = \text{cumprod}(\alpha)$   
    ## only return the  $t^{th}$  value  
    return  $\tilde{\alpha}_t$ 
```

---

---

**Algorithm 10** Computing the conditioning information

---

**def** **calcCond**(**Img**<sub>RA</sub>, {**Target**<sub>HE<sub>cls,k</sub></sub>}, {**Target**<sub>RA<sub>cls,k</sub></sub>},  $\lambda_{RA}$ , **segPadding**, **segStride**,  $k_t = 2$ ,  $k_p = 4$ ):

*##Parameters:*

*noise*: the tensor of noise

*cond*: the conditions

{**Target**<sub>HE<sub>cls,k</sub></sub>}, {**Target**<sub>RA<sub>cls,k</sub></sub>}: The optimized targets

$\lambda_{RA}$ : the optimized parameter of *ImgAlignNet*

**segPadding**, **segStride**: The parameters for segmentation

$k_t, k_p$ : the parameter for topK operation

*##Segmenting the Raman image*

1: {**Patch**<sub>RA<sub>i</sub></sub>} = **segImg**(**Img**<sub>RA</sub>, **segPadding**, **segStride**)

*##Computing the cosine similarity*

2: **dist**<sub>cls,k,i</sub> =  $\exp(|\lambda_{RA}|(\mathbf{cosSimilarity}(\mathbf{Target}_{RA_{cls,k}}, \mathbf{Patch}_{RA_i}) + 1))$

*##Using topK operation for filtering small values*

3: **dist**<sub>k',i</sub> = **reshape**(**dist**<sub>cls,k,i</sub>, [-1, i])

4: **dist**<sub>k',i'</sub> = **topk**(**dist**<sub>k',i</sub>,  $k_p$ ,  $dim = -1$ )

*##The second topK operation only abstract the values as threshold*

5: **thres** = **topk**(**dist**<sub>k',i'</sub>,  $k_t$ ,  $dim = 1$ ).values

6: *if* **dist**<sub>k',i'</sub> < **thres**:

7: **dist**<sub>k',i'</sub> = -inf

8: **dist**<sub>cls,k,i'</sub> = **reshape**(**softmax**<sub>k'</sub>(**dist**<sub>k',i'</sub>), [cls, -1, i'])

*##Using attention – like operation generating conditioning*

*##Note that the target changes to the corresponding HE targets*

9: **cond**<sub>i'</sub> =  $\sum_{cls,k} \mathbf{dist}_{cls,k,i'} \mathbf{Target}_{HE_{cls,k}}$

**return** {**cond**<sub>i'</sub>}

---

---

**Algorithm 11** The  $p$  sampling process

---

```
def pSample(noise, {cond $k$ },  $t_{Num} = 1000$ ):  
    ##Parameters:  
    noise: the tensor of noise, representing  $x_t$   
    cond: the conditions  
     $t_{Num}$ : the number of diffusion steps  
    1: for  $t \in \{1, \dots, t_{Num}\}$ :  
        ##Using UNet to compute the noise  $\epsilon$  for last step:  
        2: pred = diffionUNet(noise,  $t$ , {cond $k$ })  
        ##Generating necessary parameters, the  $\beta_{init}$  is globally consistent:  
        3:  $\tilde{\alpha}_t = \text{calcAlphaCumprod}(t, t_{Num}, \beta_{init})$   
        ##Computing  $x_0$  from  $x_t(x_0, \epsilon) = \sqrt{\tilde{\alpha}_t}x_0 + \sqrt{1 - \tilde{\alpha}_t}\epsilon$ :  
        4:  $\text{pred}' = \sqrt{\frac{1}{\tilde{\alpha}_t}}\text{noise} - \sqrt{\frac{1 - \tilde{\alpha}_t}{\tilde{\alpha}_t}}\text{pred}$   
        ##Computing posterior values:  
        5:  $\mu_t, \sigma_t = \text{calcPosteriorVals}(\text{pred}', \text{noise}, t, t_{Num}, \beta_{init})$   
        6: if  $t > 1$ :  
            7: noise =  $\mu_t + \text{randn\_like}(\text{noise})\sigma_t$   
        8: else:  
            9: noise =  $\mu_t$   
    return noise
```

---

---

**Algorithm 12** Calculating the posterior values

---

```
def calcPosteriorVals(pred', noise, t, tNum = 1000, βinit = [0.0001, 0.02]):
```

```
##Parameters:
```

*pred', noise: the input tensors from Algorithm 11 represent  $x_0$  and  $x_t$*

*t: a time step*

*t<sub>Num</sub>: the number of diffusion steps*

*β<sub>init</sub>: a hyper parameter contain the start and end value of β*

```
##Generating β using linear schedule
```

```
1: βstart, βend = βinit
```

```
2: β = linspace(βstart, βend, tNum)
```

```
##Computing α and α̃, generally they are global values
```

```
3: α = 1 - β
```

```
4: α̃ = cumprod(α)
```

```
##Generating a α̃prev, representing the previous step of α̃
```

```
5: α̃prevt = α̃t-1, α̃prev1 = 0
```

```
##Computing the posterior values from  $q(x_{t-1}|x_t, x_0) = q(x_t|x_{t-1}, x_0) \frac{q(x_{t-1}|x_0)}{q(x_t|x_0)}$ 
```

```
6: μ =  $\frac{\beta \sqrt{\alpha_{prev}}}{1 - \alpha} pred' + \frac{(1 - \alpha_{prev}) \sqrt{\alpha}}{1 - \alpha} noise$ 
```

```
7: σ =  $\sqrt{\frac{\beta(1 - \alpha_{prev})}{1 - \alpha}}$ 
```

```
## only return the tth value
```

```
return μt, σt
```

---



---

**Algorithm 13** the forward process of Diffusion UNet

---

```
def diffusionUNet( $\mathbf{x}, t, \mathbf{cond}, n_{iter} = 5, attStartIdx = 4$ ):  
    ##Parameters:  
     $\mathbf{x}$ : the input tensor  
     $t$ : a time step  
     $\mathbf{cond}$ : the conditioning information  
     $n_{iter}$ : the number of iteration  
     $attStartIdx$ : the index where start to use attention  
    ##Embedding time step, the position encoding method is from transformer  
  
    1:  $\mathbf{t}_{ebd} = \text{FC}\left(\text{SiLU}\left(\text{FC}(\text{pos\_encoding}(t))\right)\right)$   
  
    2:  $\mathbf{h}_1 = \mathbf{x}$   
    ##Down sampling iterations  
    3: for  $n \in \{1 \dots n_{iter}\}$ :  
    4:    $\mathbf{h}_{n+1} = \text{resBlock}(\text{resBlock}(\mathbf{h}_n))$   
    5:   if  $n \geq attStartIdx$ :  
    6:      $\mathbf{h}_{n+1} = \text{crossAttention}(\text{selfAttention}(\mathbf{h}_{n+1}), \mathbf{cond})$   
    ##Down sampling layer implemented by convolution layer  
    7:    $\mathbf{h}_{n+1} = \text{Conv2d}(\mathbf{h}_{n+1}, \text{kernelSize} = 3, \text{stride} = 2, \text{padding} = 1)$   
    ##After the iteration of down sampling, the footnote should be  $n_{iter} + 1$   
  
    8:  $\mathbf{g}_{n_{iter}+1} = \text{resBlock}\left(\text{crossAttention}\left(\text{selfAttention}\left(\text{resBlock}(\mathbf{h}_{n_{iter}+1})\right)\right), \mathbf{cond}\right)$   
  
    ##Up sampling iterations  
    9: for  $n \in \{n_{iter} \dots 1\}$ :  
    10:   $\mathbf{g}_n = \text{resBlock}\left(\text{resBlock}(\text{cat}(\mathbf{g}_{n+1}, \mathbf{h}_{n+1}))\right)$   
    11:  if  $n \geq attStartIdx$ :  
    12:     $\mathbf{g}_n = \text{crossAttention}(\text{selfAttention}(\mathbf{g}_n), \mathbf{cond})$   
    ##Up sampling layer implemented by interpolate operation  
    13:   $\mathbf{g}_n = \text{interpolate}(\mathbf{h}_n, \text{scale} = 2)$   
    14:  $\mathbf{img} = \text{Conv2d}(\text{SiLU}(\text{GroupNorm}(\mathbf{g}_1)))$   
    return  $\mathbf{img}$ 
```

---

**Supplementary Table 1:** Demographic information for the TSCC patients

| Case information      |                           | Patients (%) |
|-----------------------|---------------------------|--------------|
| All patients          |                           | 15(100)      |
| Age                   | Range from 29 to 79 years |              |
|                       | Median 67 years           |              |
| Gender                | Female                    | 4(26.7%)     |
|                       | Male                      | 11(73.3%)    |
| Tumor size            | T1                        | 3(20%)       |
|                       | T2                        | 9(60%)       |
|                       | T3                        | 1(6.7%)      |
|                       | T4                        | 2(13.3%)     |
| Lymph node metastasis | Positive                  | 9(60%)       |
|                       | Negative                  | 6(40%)       |
| Smoking               | Positive                  | 6(40%)       |
|                       | Negative                  | 9(60%)       |
| Alcohol abuse         | Positive                  | 5(33.3%)     |
|                       | Negative                  | 10(66.7%)    |

**Supplementary Table 2: Independently classified results for generated H&E images by three pathologists.**

**TSCC Sample #1**

| Generated H&E images                                                                | Pathologist #1                                                                                                                 | Pathologist #2                                                                                                                 | Pathologist #3                                                                                                                 |
|-------------------------------------------------------------------------------------|--------------------------------------------------------------------------------------------------------------------------------|--------------------------------------------------------------------------------------------------------------------------------|--------------------------------------------------------------------------------------------------------------------------------|
| 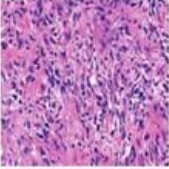   | <input checked="" type="checkbox"/> TSCC<br><input type="checkbox"/> Normal muscle tissue<br><input type="checkbox"/> Not sure | <input checked="" type="checkbox"/> TSCC<br><input type="checkbox"/> Normal muscle tissue<br><input type="checkbox"/> Not sure | <input checked="" type="checkbox"/> TSCC<br><input type="checkbox"/> Normal muscle tissue<br><input type="checkbox"/> Not sure |
|    | <input checked="" type="checkbox"/> TSCC<br><input type="checkbox"/> Normal muscle tissue<br><input type="checkbox"/> Not sure | <input checked="" type="checkbox"/> TSCC<br><input type="checkbox"/> Normal muscle tissue<br><input type="checkbox"/> Not sure | <input checked="" type="checkbox"/> TSCC<br><input type="checkbox"/> Normal muscle tissue<br><input type="checkbox"/> Not sure |
|   | <input checked="" type="checkbox"/> TSCC<br><input type="checkbox"/> Normal muscle tissue<br><input type="checkbox"/> Not sure | <input checked="" type="checkbox"/> TSCC<br><input type="checkbox"/> Normal muscle tissue<br><input type="checkbox"/> Not sure | <input checked="" type="checkbox"/> TSCC<br><input type="checkbox"/> Normal muscle tissue<br><input type="checkbox"/> Not sure |
|  | <input type="checkbox"/> TSCC<br><input checked="" type="checkbox"/> Normal muscle tissue<br><input type="checkbox"/> Not sure | <input type="checkbox"/> TSCC<br><input checked="" type="checkbox"/> Normal muscle tissue<br><input type="checkbox"/> Not sure | <input type="checkbox"/> TSCC<br><input checked="" type="checkbox"/> Normal muscle tissue<br><input type="checkbox"/> Not sure |
|  | <input type="checkbox"/> TSCC<br><input checked="" type="checkbox"/> Normal muscle tissue<br><input type="checkbox"/> Not sure | <input type="checkbox"/> TSCC<br><input type="checkbox"/> Normal muscle tissue<br><input checked="" type="checkbox"/> Not sure | <input type="checkbox"/> TSCC<br><input checked="" type="checkbox"/> Normal muscle tissue<br><input type="checkbox"/> Not sure |
|  | <input checked="" type="checkbox"/> TSCC<br><input type="checkbox"/> Normal muscle tissue<br><input type="checkbox"/> Not sure | <input checked="" type="checkbox"/> TSCC<br><input type="checkbox"/> Normal muscle tissue<br><input type="checkbox"/> Not sure | <input checked="" type="checkbox"/> TSCC<br><input type="checkbox"/> Normal muscle tissue<br><input type="checkbox"/> Not sure |
|  | <input checked="" type="checkbox"/> TSCC<br><input type="checkbox"/> Normal muscle tissue<br><input type="checkbox"/> Not sure | <input checked="" type="checkbox"/> TSCC<br><input type="checkbox"/> Normal muscle tissue<br><input type="checkbox"/> Not sure | <input checked="" type="checkbox"/> TSCC<br><input type="checkbox"/> Normal muscle tissue<br><input type="checkbox"/> Not sure |
|  | <input checked="" type="checkbox"/> TSCC<br><input type="checkbox"/> Normal muscle tissue<br><input type="checkbox"/> Not sure | <input checked="" type="checkbox"/> TSCC<br><input type="checkbox"/> Normal muscle tissue<br><input type="checkbox"/> Not sure | <input checked="" type="checkbox"/> TSCC<br><input type="checkbox"/> Normal muscle tissue<br><input type="checkbox"/> Not sure |

TSCC Sample #2

| Generated H&E images                                                                | Pathologist #1                                                                                                                 | Pathologist #2                                                                                                                 | Pathologist #3                                                                                                                 |
|-------------------------------------------------------------------------------------|--------------------------------------------------------------------------------------------------------------------------------|--------------------------------------------------------------------------------------------------------------------------------|--------------------------------------------------------------------------------------------------------------------------------|
| 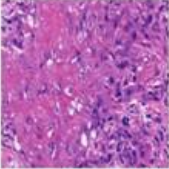   | <input checked="" type="checkbox"/> TSCC<br><input type="checkbox"/> Normal muscle tissue<br><input type="checkbox"/> Not sure | <input checked="" type="checkbox"/> TSCC<br><input type="checkbox"/> Normal muscle tissue<br><input type="checkbox"/> Not sure | <input checked="" type="checkbox"/> TSCC<br><input type="checkbox"/> Normal muscle tissue<br><input type="checkbox"/> Not sure |
|    | <input type="checkbox"/> TSCC<br><input checked="" type="checkbox"/> Normal muscle tissue<br><input type="checkbox"/> Not sure | <input type="checkbox"/> TSCC<br><input checked="" type="checkbox"/> Normal muscle tissue<br><input type="checkbox"/> Not sure | <input type="checkbox"/> TSCC<br><input checked="" type="checkbox"/> Normal muscle tissue<br><input type="checkbox"/> Not sure |
|    | <input type="checkbox"/> TSCC<br><input checked="" type="checkbox"/> Normal muscle tissue<br><input type="checkbox"/> Not sure | <input type="checkbox"/> TSCC<br><input checked="" type="checkbox"/> Normal muscle tissue<br><input type="checkbox"/> Not sure | <input type="checkbox"/> TSCC<br><input checked="" type="checkbox"/> Normal muscle tissue<br><input type="checkbox"/> Not sure |
|   | <input checked="" type="checkbox"/> TSCC<br><input type="checkbox"/> Normal muscle tissue<br><input type="checkbox"/> Not sure | <input checked="" type="checkbox"/> TSCC<br><input type="checkbox"/> Normal muscle tissue<br><input type="checkbox"/> Not sure | <input checked="" type="checkbox"/> TSCC<br><input type="checkbox"/> Normal muscle tissue<br><input type="checkbox"/> Not sure |
|  | <input type="checkbox"/> TSCC<br><input type="checkbox"/> Normal muscle tissue<br><input checked="" type="checkbox"/> Not sure | <input type="checkbox"/> TSCC<br><input type="checkbox"/> Normal muscle tissue<br><input checked="" type="checkbox"/> Not sure | <input checked="" type="checkbox"/> TSCC<br><input type="checkbox"/> Normal muscle tissue<br><input type="checkbox"/> Not sure |
|  | <input checked="" type="checkbox"/> TSCC<br><input type="checkbox"/> Normal muscle tissue<br><input type="checkbox"/> Not sure | <input checked="" type="checkbox"/> TSCC<br><input type="checkbox"/> Normal muscle tissue<br><input type="checkbox"/> Not sure | <input checked="" type="checkbox"/> TSCC<br><input type="checkbox"/> Normal muscle tissue<br><input type="checkbox"/> Not sure |
|  | <input checked="" type="checkbox"/> TSCC<br><input type="checkbox"/> Normal muscle tissue<br><input type="checkbox"/> Not sure | <input checked="" type="checkbox"/> TSCC<br><input type="checkbox"/> Normal muscle tissue<br><input type="checkbox"/> Not sure | <input checked="" type="checkbox"/> TSCC<br><input type="checkbox"/> Normal muscle tissue<br><input type="checkbox"/> Not sure |
|  | <input checked="" type="checkbox"/> TSCC<br><input type="checkbox"/> Normal muscle tissue<br><input type="checkbox"/> Not sure | <input checked="" type="checkbox"/> TSCC<br><input type="checkbox"/> Normal muscle tissue<br><input type="checkbox"/> Not sure | <input checked="" type="checkbox"/> TSCC<br><input type="checkbox"/> Normal muscle tissue<br><input type="checkbox"/> Not sure |

TSCC Sample #3

| Generated H&E images                                                                | Pathologist #1                                                                                                                 | Pathologist #2                                                                                                                 | Pathologist #3                                                                                                                 |
|-------------------------------------------------------------------------------------|--------------------------------------------------------------------------------------------------------------------------------|--------------------------------------------------------------------------------------------------------------------------------|--------------------------------------------------------------------------------------------------------------------------------|
| 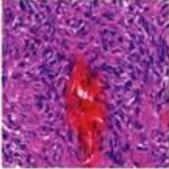   | <input checked="" type="checkbox"/> TSCC<br><input type="checkbox"/> Normal muscle tissue<br><input type="checkbox"/> Not sure | <input checked="" type="checkbox"/> TSCC<br><input type="checkbox"/> Normal muscle tissue<br><input type="checkbox"/> Not sure | <input checked="" type="checkbox"/> TSCC<br><input type="checkbox"/> Normal muscle tissue<br><input type="checkbox"/> Not sure |
|    | <input checked="" type="checkbox"/> TSCC<br><input type="checkbox"/> Normal muscle tissue<br><input type="checkbox"/> Not sure | <input checked="" type="checkbox"/> TSCC<br><input type="checkbox"/> Normal muscle tissue<br><input type="checkbox"/> Not sure | <input checked="" type="checkbox"/> TSCC<br><input type="checkbox"/> Normal muscle tissue<br><input type="checkbox"/> Not sure |
|    | <input checked="" type="checkbox"/> TSCC<br><input type="checkbox"/> Normal muscle tissue<br><input type="checkbox"/> Not sure | <input checked="" type="checkbox"/> TSCC<br><input type="checkbox"/> Normal muscle tissue<br><input type="checkbox"/> Not sure | <input checked="" type="checkbox"/> TSCC<br><input type="checkbox"/> Normal muscle tissue<br><input type="checkbox"/> Not sure |
|   | <input checked="" type="checkbox"/> TSCC<br><input type="checkbox"/> Normal muscle tissue<br><input type="checkbox"/> Not sure | <input checked="" type="checkbox"/> TSCC<br><input type="checkbox"/> Normal muscle tissue<br><input type="checkbox"/> Not sure | <input checked="" type="checkbox"/> TSCC<br><input type="checkbox"/> Normal muscle tissue<br><input type="checkbox"/> Not sure |
|  | <input type="checkbox"/> TSCC<br><input type="checkbox"/> Normal muscle tissue<br><input checked="" type="checkbox"/> Not sure | <input checked="" type="checkbox"/> TSCC<br><input type="checkbox"/> Normal muscle tissue<br><input type="checkbox"/> Not sure | <input checked="" type="checkbox"/> TSCC<br><input type="checkbox"/> Normal muscle tissue<br><input type="checkbox"/> Not sure |
|  | <input checked="" type="checkbox"/> TSCC<br><input type="checkbox"/> Normal muscle tissue<br><input type="checkbox"/> Not sure | <input checked="" type="checkbox"/> TSCC<br><input type="checkbox"/> Normal muscle tissue<br><input type="checkbox"/> Not sure | <input checked="" type="checkbox"/> TSCC<br><input type="checkbox"/> Normal muscle tissue<br><input type="checkbox"/> Not sure |
|  | <input checked="" type="checkbox"/> TSCC<br><input type="checkbox"/> Normal muscle tissue<br><input type="checkbox"/> Not sure | <input checked="" type="checkbox"/> TSCC<br><input type="checkbox"/> Normal muscle tissue<br><input type="checkbox"/> Not sure | <input checked="" type="checkbox"/> TSCC<br><input type="checkbox"/> Normal muscle tissue<br><input type="checkbox"/> Not sure |
|  | <input type="checkbox"/> TSCC<br><input checked="" type="checkbox"/> Normal muscle tissue<br><input type="checkbox"/> Not sure | <input type="checkbox"/> TSCC<br><input checked="" type="checkbox"/> Normal muscle tissue<br><input type="checkbox"/> Not sure | <input type="checkbox"/> TSCC<br><input checked="" type="checkbox"/> Normal muscle tissue<br><input type="checkbox"/> Not sure |



TSCC Sample #4

| Generated H&E images                                                                | Pathologist #1                                                                                                                 | Pathologist #2                                                                                                                 | Pathologist #3                                                                                                                 |
|-------------------------------------------------------------------------------------|--------------------------------------------------------------------------------------------------------------------------------|--------------------------------------------------------------------------------------------------------------------------------|--------------------------------------------------------------------------------------------------------------------------------|
| 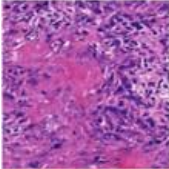   | <input checked="" type="checkbox"/> TSCC<br><input type="checkbox"/> Normal muscle tissue<br><input type="checkbox"/> Not sure | <input checked="" type="checkbox"/> TSCC<br><input type="checkbox"/> Normal muscle tissue<br><input type="checkbox"/> Not sure | <input checked="" type="checkbox"/> TSCC<br><input type="checkbox"/> Normal muscle tissue<br><input type="checkbox"/> Not sure |
|    | <input type="checkbox"/> TSCC<br><input checked="" type="checkbox"/> Normal muscle tissue<br><input type="checkbox"/> Not sure | <input type="checkbox"/> TSCC<br><input checked="" type="checkbox"/> Normal muscle tissue<br><input type="checkbox"/> Not sure | <input type="checkbox"/> TSCC<br><input checked="" type="checkbox"/> Normal muscle tissue<br><input type="checkbox"/> Not sure |
|    | <input checked="" type="checkbox"/> TSCC<br><input type="checkbox"/> Normal muscle tissue<br><input type="checkbox"/> Not sure | <input checked="" type="checkbox"/> TSCC<br><input type="checkbox"/> Normal muscle tissue<br><input type="checkbox"/> Not sure | <input checked="" type="checkbox"/> TSCC<br><input type="checkbox"/> Normal muscle tissue<br><input type="checkbox"/> Not sure |
|   | <input checked="" type="checkbox"/> TSCC<br><input type="checkbox"/> Normal muscle tissue<br><input type="checkbox"/> Not sure | <input checked="" type="checkbox"/> TSCC<br><input type="checkbox"/> Normal muscle tissue<br><input type="checkbox"/> Not sure | <input checked="" type="checkbox"/> TSCC<br><input type="checkbox"/> Normal muscle tissue<br><input type="checkbox"/> Not sure |
|  | <input checked="" type="checkbox"/> TSCC<br><input type="checkbox"/> Normal muscle tissue<br><input type="checkbox"/> Not sure | <input checked="" type="checkbox"/> TSCC<br><input type="checkbox"/> Normal muscle tissue<br><input type="checkbox"/> Not sure | <input checked="" type="checkbox"/> TSCC<br><input type="checkbox"/> Normal muscle tissue<br><input type="checkbox"/> Not sure |
|  | <input type="checkbox"/> TSCC<br><input checked="" type="checkbox"/> Normal muscle tissue<br><input type="checkbox"/> Not sure | <input type="checkbox"/> TSCC<br><input checked="" type="checkbox"/> Normal muscle tissue<br><input type="checkbox"/> Not sure | <input type="checkbox"/> TSCC<br><input checked="" type="checkbox"/> Normal muscle tissue<br><input type="checkbox"/> Not sure |
|  | <input checked="" type="checkbox"/> TSCC<br><input type="checkbox"/> Normal muscle tissue<br><input type="checkbox"/> Not sure | <input checked="" type="checkbox"/> TSCC<br><input type="checkbox"/> Normal muscle tissue<br><input type="checkbox"/> Not sure | <input checked="" type="checkbox"/> TSCC<br><input type="checkbox"/> Normal muscle tissue<br><input type="checkbox"/> Not sure |
|  | <input checked="" type="checkbox"/> TSCC<br><input type="checkbox"/> Normal muscle tissue<br><input type="checkbox"/> Not sure | <input checked="" type="checkbox"/> TSCC<br><input type="checkbox"/> Normal muscle tissue<br><input type="checkbox"/> Not sure | <input checked="" type="checkbox"/> TSCC<br><input type="checkbox"/> Normal muscle tissue<br><input type="checkbox"/> Not sure |

TSCC Sample #5

| Generated H&E images                                                                | Pathologist #1                                                                                                                 | Pathologist #2                                                                                                                 | Pathologist #3                                                                                                                 |
|-------------------------------------------------------------------------------------|--------------------------------------------------------------------------------------------------------------------------------|--------------------------------------------------------------------------------------------------------------------------------|--------------------------------------------------------------------------------------------------------------------------------|
| 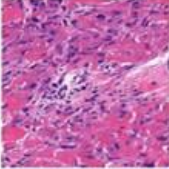   | <input checked="" type="checkbox"/> TSCC<br><input type="checkbox"/> Normal muscle tissue<br><input type="checkbox"/> Not sure | <input checked="" type="checkbox"/> TSCC<br><input type="checkbox"/> Normal muscle tissue<br><input type="checkbox"/> Not sure | <input checked="" type="checkbox"/> TSCC<br><input type="checkbox"/> Normal muscle tissue<br><input type="checkbox"/> Not sure |
|    | <input checked="" type="checkbox"/> TSCC<br><input type="checkbox"/> Normal muscle tissue<br><input type="checkbox"/> Not sure | <input checked="" type="checkbox"/> TSCC<br><input type="checkbox"/> Normal muscle tissue<br><input type="checkbox"/> Not sure | <input checked="" type="checkbox"/> TSCC<br><input type="checkbox"/> Normal muscle tissue<br><input type="checkbox"/> Not sure |
|    | <input checked="" type="checkbox"/> TSCC<br><input type="checkbox"/> Normal muscle tissue<br><input type="checkbox"/> Not sure | <input type="checkbox"/> TSCC<br><input type="checkbox"/> Normal muscle tissue<br><input checked="" type="checkbox"/> Not sure | <input checked="" type="checkbox"/> TSCC<br><input type="checkbox"/> Normal muscle tissue<br><input type="checkbox"/> Not sure |
|   | <input type="checkbox"/> TSCC<br><input checked="" type="checkbox"/> Normal muscle tissue<br><input type="checkbox"/> Not sure | <input type="checkbox"/> TSCC<br><input checked="" type="checkbox"/> Normal muscle tissue<br><input type="checkbox"/> Not sure | <input type="checkbox"/> TSCC<br><input checked="" type="checkbox"/> Normal muscle tissue<br><input type="checkbox"/> Not sure |
|  | <input checked="" type="checkbox"/> TSCC<br><input type="checkbox"/> Normal muscle tissue<br><input type="checkbox"/> Not sure | <input checked="" type="checkbox"/> TSCC<br><input type="checkbox"/> Normal muscle tissue<br><input type="checkbox"/> Not sure | <input checked="" type="checkbox"/> TSCC<br><input type="checkbox"/> Normal muscle tissue<br><input type="checkbox"/> Not sure |
|  | <input checked="" type="checkbox"/> TSCC<br><input type="checkbox"/> Normal muscle tissue<br><input type="checkbox"/> Not sure | <input checked="" type="checkbox"/> TSCC<br><input type="checkbox"/> Normal muscle tissue<br><input type="checkbox"/> Not sure | <input checked="" type="checkbox"/> TSCC<br><input type="checkbox"/> Normal muscle tissue<br><input type="checkbox"/> Not sure |
|  | <input checked="" type="checkbox"/> TSCC<br><input type="checkbox"/> Normal muscle tissue<br><input type="checkbox"/> Not sure | <input checked="" type="checkbox"/> TSCC<br><input type="checkbox"/> Normal muscle tissue<br><input type="checkbox"/> Not sure | <input checked="" type="checkbox"/> TSCC<br><input type="checkbox"/> Normal muscle tissue<br><input type="checkbox"/> Not sure |
|  | <input type="checkbox"/> TSCC<br><input type="checkbox"/> Normal muscle tissue<br><input checked="" type="checkbox"/> Not sure | <input checked="" type="checkbox"/> TSCC<br><input type="checkbox"/> Normal muscle tissue<br><input type="checkbox"/> Not sure | <input checked="" type="checkbox"/> TSCC<br><input type="checkbox"/> Normal muscle tissue<br><input type="checkbox"/> Not sure |

TSCC Sample #6

| Generated H&E images                                                                | Pathologist #1                                                                                                                 | Pathologist #2                                                                                                                 | Pathologist #3                                                                                                                 |
|-------------------------------------------------------------------------------------|--------------------------------------------------------------------------------------------------------------------------------|--------------------------------------------------------------------------------------------------------------------------------|--------------------------------------------------------------------------------------------------------------------------------|
| 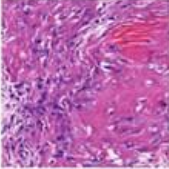   | <input checked="" type="checkbox"/> TSCC<br><input type="checkbox"/> Normal muscle tissue<br><input type="checkbox"/> Not sure | <input checked="" type="checkbox"/> TSCC<br><input type="checkbox"/> Normal muscle tissue<br><input type="checkbox"/> Not sure | <input checked="" type="checkbox"/> TSCC<br><input type="checkbox"/> Normal muscle tissue<br><input type="checkbox"/> Not sure |
|    | <input checked="" type="checkbox"/> TSCC<br><input type="checkbox"/> Normal muscle tissue<br><input type="checkbox"/> Not sure | <input type="checkbox"/> TSCC<br><input type="checkbox"/> Normal muscle tissue<br><input checked="" type="checkbox"/> Not sure | <input checked="" type="checkbox"/> TSCC<br><input type="checkbox"/> Normal muscle tissue<br><input type="checkbox"/> Not sure |
|    | <input checked="" type="checkbox"/> TSCC<br><input type="checkbox"/> Normal muscle tissue<br><input type="checkbox"/> Not sure | <input checked="" type="checkbox"/> TSCC<br><input type="checkbox"/> Normal muscle tissue<br><input type="checkbox"/> Not sure | <input checked="" type="checkbox"/> TSCC<br><input type="checkbox"/> Normal muscle tissue<br><input type="checkbox"/> Not sure |
|   | <input checked="" type="checkbox"/> TSCC<br><input type="checkbox"/> Normal muscle tissue<br><input type="checkbox"/> Not sure | <input checked="" type="checkbox"/> TSCC<br><input type="checkbox"/> Normal muscle tissue<br><input type="checkbox"/> Not sure | <input checked="" type="checkbox"/> TSCC<br><input type="checkbox"/> Normal muscle tissue<br><input type="checkbox"/> Not sure |
|  | <input checked="" type="checkbox"/> TSCC<br><input type="checkbox"/> Normal muscle tissue<br><input type="checkbox"/> Not sure | <input checked="" type="checkbox"/> TSCC<br><input type="checkbox"/> Normal muscle tissue<br><input type="checkbox"/> Not sure | <input checked="" type="checkbox"/> TSCC<br><input type="checkbox"/> Normal muscle tissue<br><input type="checkbox"/> Not sure |
|  | <input checked="" type="checkbox"/> TSCC<br><input type="checkbox"/> Normal muscle tissue<br><input type="checkbox"/> Not sure | <input checked="" type="checkbox"/> TSCC<br><input type="checkbox"/> Normal muscle tissue<br><input type="checkbox"/> Not sure | <input checked="" type="checkbox"/> TSCC<br><input type="checkbox"/> Normal muscle tissue<br><input type="checkbox"/> Not sure |
|  | <input checked="" type="checkbox"/> TSCC<br><input type="checkbox"/> Normal muscle tissue<br><input type="checkbox"/> Not sure | <input checked="" type="checkbox"/> TSCC<br><input type="checkbox"/> Normal muscle tissue<br><input type="checkbox"/> Not sure | <input checked="" type="checkbox"/> TSCC<br><input type="checkbox"/> Normal muscle tissue<br><input type="checkbox"/> Not sure |
|  | <input checked="" type="checkbox"/> TSCC<br><input type="checkbox"/> Normal muscle tissue<br><input type="checkbox"/> Not sure | <input checked="" type="checkbox"/> TSCC<br><input type="checkbox"/> Normal muscle tissue<br><input type="checkbox"/> Not sure | <input checked="" type="checkbox"/> TSCC<br><input type="checkbox"/> Normal muscle tissue<br><input type="checkbox"/> Not sure |



TSCC Sample #7

| Generated H&E images                                                                | Pathologist #1                                                                                                                 | Pathologist #2                                                                                                                 | Pathologist #3                                                                                                                 |
|-------------------------------------------------------------------------------------|--------------------------------------------------------------------------------------------------------------------------------|--------------------------------------------------------------------------------------------------------------------------------|--------------------------------------------------------------------------------------------------------------------------------|
| 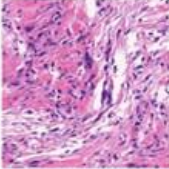   | <input checked="" type="checkbox"/> TSCC<br><input type="checkbox"/> Normal muscle tissue<br><input type="checkbox"/> Not sure | <input checked="" type="checkbox"/> TSCC<br><input type="checkbox"/> Normal muscle tissue<br><input type="checkbox"/> Not sure | <input checked="" type="checkbox"/> TSCC<br><input type="checkbox"/> Normal muscle tissue<br><input type="checkbox"/> Not sure |
|    | <input checked="" type="checkbox"/> TSCC<br><input type="checkbox"/> Normal muscle tissue<br><input type="checkbox"/> Not sure | <input type="checkbox"/> TSCC<br><input type="checkbox"/> Normal muscle tissue<br><input checked="" type="checkbox"/> Not sure | <input checked="" type="checkbox"/> TSCC<br><input type="checkbox"/> Normal muscle tissue<br><input type="checkbox"/> Not sure |
|    | <input type="checkbox"/> TSCC<br><input checked="" type="checkbox"/> Normal muscle tissue<br><input type="checkbox"/> Not sure | <input type="checkbox"/> TSCC<br><input checked="" type="checkbox"/> Normal muscle tissue<br><input type="checkbox"/> Not sure | <input type="checkbox"/> TSCC<br><input checked="" type="checkbox"/> Normal muscle tissue<br><input type="checkbox"/> Not sure |
|   | <input type="checkbox"/> TSCC<br><input checked="" type="checkbox"/> Normal muscle tissue<br><input type="checkbox"/> Not sure | <input type="checkbox"/> TSCC<br><input checked="" type="checkbox"/> Normal muscle tissue<br><input type="checkbox"/> Not sure | <input type="checkbox"/> TSCC<br><input checked="" type="checkbox"/> Normal muscle tissue<br><input type="checkbox"/> Not sure |
|  | <input checked="" type="checkbox"/> TSCC<br><input type="checkbox"/> Normal muscle tissue<br><input type="checkbox"/> Not sure | <input checked="" type="checkbox"/> TSCC<br><input type="checkbox"/> Normal muscle tissue<br><input type="checkbox"/> Not sure | <input checked="" type="checkbox"/> TSCC<br><input type="checkbox"/> Normal muscle tissue<br><input type="checkbox"/> Not sure |
|  | <input type="checkbox"/> TSCC<br><input checked="" type="checkbox"/> Normal muscle tissue<br><input type="checkbox"/> Not sure | <input type="checkbox"/> TSCC<br><input checked="" type="checkbox"/> Normal muscle tissue<br><input type="checkbox"/> Not sure | <input type="checkbox"/> TSCC<br><input checked="" type="checkbox"/> Normal muscle tissue<br><input type="checkbox"/> Not sure |
|  | <input type="checkbox"/> TSCC<br><input checked="" type="checkbox"/> Normal muscle tissue<br><input type="checkbox"/> Not sure | <input type="checkbox"/> TSCC<br><input checked="" type="checkbox"/> Normal muscle tissue<br><input type="checkbox"/> Not sure | <input type="checkbox"/> TSCC<br><input checked="" type="checkbox"/> Normal muscle tissue<br><input type="checkbox"/> Not sure |
|  | <input checked="" type="checkbox"/> TSCC<br><input type="checkbox"/> Normal muscle tissue<br><input type="checkbox"/> Not sure | <input checked="" type="checkbox"/> TSCC<br><input type="checkbox"/> Normal muscle tissue<br><input type="checkbox"/> Not sure | <input checked="" type="checkbox"/> TSCC<br><input type="checkbox"/> Normal muscle tissue<br><input type="checkbox"/> Not sure |

TSCC Sample #8

| Generated H&E images                                                                | Pathologist #1                                                                                                                 | Pathologist #2                                                                                                                 | Pathologist #3                                                                                                                 |
|-------------------------------------------------------------------------------------|--------------------------------------------------------------------------------------------------------------------------------|--------------------------------------------------------------------------------------------------------------------------------|--------------------------------------------------------------------------------------------------------------------------------|
| 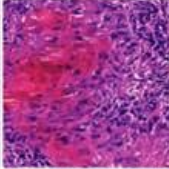   | <input checked="" type="checkbox"/> TSCC<br><input type="checkbox"/> Normal muscle tissue<br><input type="checkbox"/> Not sure | <input checked="" type="checkbox"/> TSCC<br><input type="checkbox"/> Normal muscle tissue<br><input type="checkbox"/> Not sure | <input checked="" type="checkbox"/> TSCC<br><input type="checkbox"/> Normal muscle tissue<br><input type="checkbox"/> Not sure |
|    | <input checked="" type="checkbox"/> TSCC<br><input type="checkbox"/> Normal muscle tissue<br><input type="checkbox"/> Not sure | <input checked="" type="checkbox"/> TSCC<br><input type="checkbox"/> Normal muscle tissue<br><input type="checkbox"/> Not sure | <input checked="" type="checkbox"/> TSCC<br><input type="checkbox"/> Normal muscle tissue<br><input type="checkbox"/> Not sure |
|    | <input checked="" type="checkbox"/> TSCC<br><input type="checkbox"/> Normal muscle tissue<br><input type="checkbox"/> Not sure | <input checked="" type="checkbox"/> TSCC<br><input type="checkbox"/> Normal muscle tissue<br><input type="checkbox"/> Not sure | <input checked="" type="checkbox"/> TSCC<br><input type="checkbox"/> Normal muscle tissue<br><input type="checkbox"/> Not sure |
|   | <input checked="" type="checkbox"/> TSCC<br><input type="checkbox"/> Normal muscle tissue<br><input type="checkbox"/> Not sure | <input checked="" type="checkbox"/> TSCC<br><input type="checkbox"/> Normal muscle tissue<br><input type="checkbox"/> Not sure | <input checked="" type="checkbox"/> TSCC<br><input type="checkbox"/> Normal muscle tissue<br><input type="checkbox"/> Not sure |
|  | <input checked="" type="checkbox"/> TSCC<br><input type="checkbox"/> Normal muscle tissue<br><input type="checkbox"/> Not sure | <input type="checkbox"/> TSCC<br><input type="checkbox"/> Normal muscle tissue<br><input checked="" type="checkbox"/> Not sure | <input checked="" type="checkbox"/> TSCC<br><input type="checkbox"/> Normal muscle tissue<br><input type="checkbox"/> Not sure |
|  | <input checked="" type="checkbox"/> TSCC<br><input type="checkbox"/> Normal muscle tissue<br><input type="checkbox"/> Not sure | <input checked="" type="checkbox"/> TSCC<br><input type="checkbox"/> Normal muscle tissue<br><input type="checkbox"/> Not sure | <input checked="" type="checkbox"/> TSCC<br><input type="checkbox"/> Normal muscle tissue<br><input type="checkbox"/> Not sure |
|  | <input checked="" type="checkbox"/> TSCC<br><input type="checkbox"/> Normal muscle tissue<br><input type="checkbox"/> Not sure | <input checked="" type="checkbox"/> TSCC<br><input type="checkbox"/> Normal muscle tissue<br><input type="checkbox"/> Not sure | <input checked="" type="checkbox"/> TSCC<br><input type="checkbox"/> Normal muscle tissue<br><input type="checkbox"/> Not sure |
|  | <input checked="" type="checkbox"/> TSCC<br><input type="checkbox"/> Normal muscle tissue<br><input type="checkbox"/> Not sure | <input checked="" type="checkbox"/> TSCC<br><input type="checkbox"/> Normal muscle tissue<br><input type="checkbox"/> Not sure | <input checked="" type="checkbox"/> TSCC<br><input type="checkbox"/> Normal muscle tissue<br><input type="checkbox"/> Not sure |



TSCC Sample #9

| Generated H&E images                                                                | Pathologist #1                                                                                                                 | Pathologist #2                                                                                                                 | Pathologist #3                                                                                                                 |
|-------------------------------------------------------------------------------------|--------------------------------------------------------------------------------------------------------------------------------|--------------------------------------------------------------------------------------------------------------------------------|--------------------------------------------------------------------------------------------------------------------------------|
| 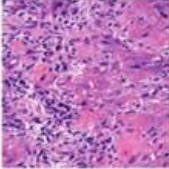   | <input checked="" type="checkbox"/> TSCC<br><input type="checkbox"/> Normal muscle tissue<br><input type="checkbox"/> Not sure | <input checked="" type="checkbox"/> TSCC<br><input type="checkbox"/> Normal muscle tissue<br><input type="checkbox"/> Not sure | <input checked="" type="checkbox"/> TSCC<br><input type="checkbox"/> Normal muscle tissue<br><input type="checkbox"/> Not sure |
|    | <input checked="" type="checkbox"/> TSCC<br><input type="checkbox"/> Normal muscle tissue<br><input type="checkbox"/> Not sure | <input checked="" type="checkbox"/> TSCC<br><input type="checkbox"/> Normal muscle tissue<br><input type="checkbox"/> Not sure | <input checked="" type="checkbox"/> TSCC<br><input type="checkbox"/> Normal muscle tissue<br><input type="checkbox"/> Not sure |
|    | <input checked="" type="checkbox"/> TSCC<br><input type="checkbox"/> Normal muscle tissue<br><input type="checkbox"/> Not sure | <input checked="" type="checkbox"/> TSCC<br><input type="checkbox"/> Normal muscle tissue<br><input type="checkbox"/> Not sure | <input checked="" type="checkbox"/> TSCC<br><input type="checkbox"/> Normal muscle tissue<br><input type="checkbox"/> Not sure |
|   | <input checked="" type="checkbox"/> TSCC<br><input type="checkbox"/> Normal muscle tissue<br><input type="checkbox"/> Not sure | <input checked="" type="checkbox"/> TSCC<br><input type="checkbox"/> Normal muscle tissue<br><input type="checkbox"/> Not sure | <input checked="" type="checkbox"/> TSCC<br><input type="checkbox"/> Normal muscle tissue<br><input type="checkbox"/> Not sure |
|  | <input type="checkbox"/> TSCC<br><input checked="" type="checkbox"/> Normal muscle tissue<br><input type="checkbox"/> Not sure | <input type="checkbox"/> TSCC<br><input checked="" type="checkbox"/> Normal muscle tissue<br><input type="checkbox"/> Not sure | <input type="checkbox"/> TSCC<br><input checked="" type="checkbox"/> Normal muscle tissue<br><input type="checkbox"/> Not sure |
|  | <input checked="" type="checkbox"/> TSCC<br><input type="checkbox"/> Normal muscle tissue<br><input type="checkbox"/> Not sure | <input checked="" type="checkbox"/> TSCC<br><input type="checkbox"/> Normal muscle tissue<br><input type="checkbox"/> Not sure | <input checked="" type="checkbox"/> TSCC<br><input type="checkbox"/> Normal muscle tissue<br><input type="checkbox"/> Not sure |
|  | <input checked="" type="checkbox"/> TSCC<br><input type="checkbox"/> Normal muscle tissue<br><input type="checkbox"/> Not sure | <input checked="" type="checkbox"/> TSCC<br><input type="checkbox"/> Normal muscle tissue<br><input type="checkbox"/> Not sure | <input checked="" type="checkbox"/> TSCC<br><input type="checkbox"/> Normal muscle tissue<br><input type="checkbox"/> Not sure |
|  | <input checked="" type="checkbox"/> TSCC<br><input type="checkbox"/> Normal muscle tissue<br><input type="checkbox"/> Not sure | <input checked="" type="checkbox"/> TSCC<br><input type="checkbox"/> Normal muscle tissue<br><input type="checkbox"/> Not sure | <input checked="" type="checkbox"/> TSCC<br><input type="checkbox"/> Normal muscle tissue<br><input type="checkbox"/> Not sure |

TSCC Sample #10

| Generated H&E images                                                                | Pathologist #1                                                                                                                 | Pathologist #2                                                                                                                 | Pathologist #3                                                                                                                 |
|-------------------------------------------------------------------------------------|--------------------------------------------------------------------------------------------------------------------------------|--------------------------------------------------------------------------------------------------------------------------------|--------------------------------------------------------------------------------------------------------------------------------|
| 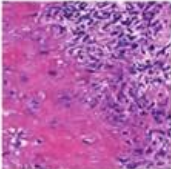   | <input checked="" type="checkbox"/> TSCC<br><input type="checkbox"/> Normal muscle tissue<br><input type="checkbox"/> Not sure | <input checked="" type="checkbox"/> TSCC<br><input type="checkbox"/> Normal muscle tissue<br><input type="checkbox"/> Not sure | <input checked="" type="checkbox"/> TSCC<br><input type="checkbox"/> Normal muscle tissue<br><input type="checkbox"/> Not sure |
|    | <input checked="" type="checkbox"/> TSCC<br><input type="checkbox"/> Normal muscle tissue<br><input type="checkbox"/> Not sure | <input checked="" type="checkbox"/> TSCC<br><input type="checkbox"/> Normal muscle tissue<br><input type="checkbox"/> Not sure | <input checked="" type="checkbox"/> TSCC<br><input type="checkbox"/> Normal muscle tissue<br><input type="checkbox"/> Not sure |
|    | <input checked="" type="checkbox"/> TSCC<br><input type="checkbox"/> Normal muscle tissue<br><input type="checkbox"/> Not sure | <input type="checkbox"/> TSCC<br><input type="checkbox"/> Normal muscle tissue<br><input checked="" type="checkbox"/> Not sure | <input checked="" type="checkbox"/> TSCC<br><input type="checkbox"/> Normal muscle tissue<br><input type="checkbox"/> Not sure |
|   | <input checked="" type="checkbox"/> TSCC<br><input type="checkbox"/> Normal muscle tissue<br><input type="checkbox"/> Not sure | <input type="checkbox"/> TSCC<br><input type="checkbox"/> Normal muscle tissue<br><input checked="" type="checkbox"/> Not sure | <input checked="" type="checkbox"/> TSCC<br><input type="checkbox"/> Normal muscle tissue<br><input type="checkbox"/> Not sure |
|  | <input checked="" type="checkbox"/> TSCC<br><input type="checkbox"/> Normal muscle tissue<br><input type="checkbox"/> Not sure | <input checked="" type="checkbox"/> TSCC<br><input type="checkbox"/> Normal muscle tissue<br><input type="checkbox"/> Not sure | <input checked="" type="checkbox"/> TSCC<br><input type="checkbox"/> Normal muscle tissue<br><input type="checkbox"/> Not sure |
|  | <input checked="" type="checkbox"/> TSCC<br><input type="checkbox"/> Normal muscle tissue<br><input type="checkbox"/> Not sure | <input checked="" type="checkbox"/> TSCC<br><input type="checkbox"/> Normal muscle tissue<br><input type="checkbox"/> Not sure | <input checked="" type="checkbox"/> TSCC<br><input type="checkbox"/> Normal muscle tissue<br><input type="checkbox"/> Not sure |
|  | <input checked="" type="checkbox"/> TSCC<br><input type="checkbox"/> Normal muscle tissue<br><input type="checkbox"/> Not sure | <input checked="" type="checkbox"/> TSCC<br><input type="checkbox"/> Normal muscle tissue<br><input type="checkbox"/> Not sure | <input checked="" type="checkbox"/> TSCC<br><input type="checkbox"/> Normal muscle tissue<br><input type="checkbox"/> Not sure |
|  | <input checked="" type="checkbox"/> TSCC<br><input type="checkbox"/> Normal muscle tissue<br><input type="checkbox"/> Not sure | <input checked="" type="checkbox"/> TSCC<br><input type="checkbox"/> Normal muscle tissue<br><input type="checkbox"/> Not sure | <input checked="" type="checkbox"/> TSCC<br><input type="checkbox"/> Normal muscle tissue<br><input type="checkbox"/> Not sure |

TSCC Sample #11

| Generated H&E images                                                                | Pathologist #1                                                                                                                 | Pathologist #2                                                                                                                 | Pathologist #3                                                                                                                 |
|-------------------------------------------------------------------------------------|--------------------------------------------------------------------------------------------------------------------------------|--------------------------------------------------------------------------------------------------------------------------------|--------------------------------------------------------------------------------------------------------------------------------|
| 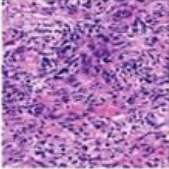   | <input checked="" type="checkbox"/> TSCC<br><input type="checkbox"/> Normal muscle tissue<br><input type="checkbox"/> Not sure | <input checked="" type="checkbox"/> TSCC<br><input type="checkbox"/> Normal muscle tissue<br><input type="checkbox"/> Not sure | <input checked="" type="checkbox"/> TSCC<br><input type="checkbox"/> Normal muscle tissue<br><input type="checkbox"/> Not sure |
|    | <input checked="" type="checkbox"/> TSCC<br><input type="checkbox"/> Normal muscle tissue<br><input type="checkbox"/> Not sure | <input checked="" type="checkbox"/> TSCC<br><input type="checkbox"/> Normal muscle tissue<br><input type="checkbox"/> Not sure | <input checked="" type="checkbox"/> TSCC<br><input type="checkbox"/> Normal muscle tissue<br><input type="checkbox"/> Not sure |
|    | <input checked="" type="checkbox"/> TSCC<br><input type="checkbox"/> Normal muscle tissue<br><input type="checkbox"/> Not sure | <input checked="" type="checkbox"/> TSCC<br><input type="checkbox"/> Normal muscle tissue<br><input type="checkbox"/> Not sure | <input checked="" type="checkbox"/> TSCC<br><input type="checkbox"/> Normal muscle tissue<br><input type="checkbox"/> Not sure |
|   | <input checked="" type="checkbox"/> TSCC<br><input type="checkbox"/> Normal muscle tissue<br><input type="checkbox"/> Not sure | <input checked="" type="checkbox"/> TSCC<br><input type="checkbox"/> Normal muscle tissue<br><input type="checkbox"/> Not sure | <input checked="" type="checkbox"/> TSCC<br><input type="checkbox"/> Normal muscle tissue<br><input type="checkbox"/> Not sure |
|  | <input checked="" type="checkbox"/> TSCC<br><input type="checkbox"/> Normal muscle tissue<br><input type="checkbox"/> Not sure | <input checked="" type="checkbox"/> TSCC<br><input type="checkbox"/> Normal muscle tissue<br><input type="checkbox"/> Not sure | <input checked="" type="checkbox"/> TSCC<br><input type="checkbox"/> Normal muscle tissue<br><input type="checkbox"/> Not sure |
|  | <input checked="" type="checkbox"/> TSCC<br><input type="checkbox"/> Normal muscle tissue<br><input type="checkbox"/> Not sure | <input checked="" type="checkbox"/> TSCC<br><input type="checkbox"/> Normal muscle tissue<br><input type="checkbox"/> Not sure | <input checked="" type="checkbox"/> TSCC<br><input type="checkbox"/> Normal muscle tissue<br><input type="checkbox"/> Not sure |
|  | <input checked="" type="checkbox"/> TSCC<br><input type="checkbox"/> Normal muscle tissue<br><input type="checkbox"/> Not sure | <input checked="" type="checkbox"/> TSCC<br><input type="checkbox"/> Normal muscle tissue<br><input type="checkbox"/> Not sure | <input checked="" type="checkbox"/> TSCC<br><input type="checkbox"/> Normal muscle tissue<br><input type="checkbox"/> Not sure |
|  | <input checked="" type="checkbox"/> TSCC<br><input type="checkbox"/> Normal muscle tissue<br><input type="checkbox"/> Not sure | <input checked="" type="checkbox"/> TSCC<br><input type="checkbox"/> Normal muscle tissue<br><input type="checkbox"/> Not sure | <input checked="" type="checkbox"/> TSCC<br><input type="checkbox"/> Normal muscle tissue<br><input type="checkbox"/> Not sure |



TSCC Sample #12

| Generated H&E images                                                                | Pathologist #1                                                                                                                 | Pathologist #2                                                                                                                 | Pathologist #3                                                                                                                 |
|-------------------------------------------------------------------------------------|--------------------------------------------------------------------------------------------------------------------------------|--------------------------------------------------------------------------------------------------------------------------------|--------------------------------------------------------------------------------------------------------------------------------|
| 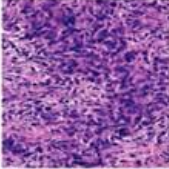   | <input checked="" type="checkbox"/> TSCC<br><input type="checkbox"/> Normal muscle tissue<br><input type="checkbox"/> Not sure | <input checked="" type="checkbox"/> TSCC<br><input type="checkbox"/> Normal muscle tissue<br><input type="checkbox"/> Not sure | <input checked="" type="checkbox"/> TSCC<br><input type="checkbox"/> Normal muscle tissue<br><input type="checkbox"/> Not sure |
|    | <input checked="" type="checkbox"/> TSCC<br><input type="checkbox"/> Normal muscle tissue<br><input type="checkbox"/> Not sure | <input type="checkbox"/> TSCC<br><input type="checkbox"/> Normal muscle tissue<br><input checked="" type="checkbox"/> Not sure | <input checked="" type="checkbox"/> TSCC<br><input type="checkbox"/> Normal muscle tissue<br><input type="checkbox"/> Not sure |
|    | <input checked="" type="checkbox"/> TSCC<br><input type="checkbox"/> Normal muscle tissue<br><input type="checkbox"/> Not sure | <input checked="" type="checkbox"/> TSCC<br><input type="checkbox"/> Normal muscle tissue<br><input type="checkbox"/> Not sure | <input checked="" type="checkbox"/> TSCC<br><input type="checkbox"/> Normal muscle tissue<br><input type="checkbox"/> Not sure |
|   | <input checked="" type="checkbox"/> TSCC<br><input type="checkbox"/> Normal muscle tissue<br><input type="checkbox"/> Not sure | <input checked="" type="checkbox"/> TSCC<br><input type="checkbox"/> Normal muscle tissue<br><input type="checkbox"/> Not sure | <input checked="" type="checkbox"/> TSCC<br><input type="checkbox"/> Normal muscle tissue<br><input type="checkbox"/> Not sure |
|  | <input checked="" type="checkbox"/> TSCC<br><input type="checkbox"/> Normal muscle tissue<br><input type="checkbox"/> Not sure | <input checked="" type="checkbox"/> TSCC<br><input type="checkbox"/> Normal muscle tissue<br><input type="checkbox"/> Not sure | <input checked="" type="checkbox"/> TSCC<br><input type="checkbox"/> Normal muscle tissue<br><input type="checkbox"/> Not sure |
|  | <input checked="" type="checkbox"/> TSCC<br><input type="checkbox"/> Normal muscle tissue<br><input type="checkbox"/> Not sure | <input checked="" type="checkbox"/> TSCC<br><input type="checkbox"/> Normal muscle tissue<br><input type="checkbox"/> Not sure | <input checked="" type="checkbox"/> TSCC<br><input type="checkbox"/> Normal muscle tissue<br><input type="checkbox"/> Not sure |
|  | <input checked="" type="checkbox"/> TSCC<br><input type="checkbox"/> Normal muscle tissue<br><input type="checkbox"/> Not sure | <input checked="" type="checkbox"/> TSCC<br><input type="checkbox"/> Normal muscle tissue<br><input type="checkbox"/> Not sure | <input checked="" type="checkbox"/> TSCC<br><input type="checkbox"/> Normal muscle tissue<br><input type="checkbox"/> Not sure |
|  | <input checked="" type="checkbox"/> TSCC<br><input type="checkbox"/> Normal muscle tissue<br><input type="checkbox"/> Not sure | <input checked="" type="checkbox"/> TSCC<br><input type="checkbox"/> Normal muscle tissue<br><input type="checkbox"/> Not sure | <input checked="" type="checkbox"/> TSCC<br><input type="checkbox"/> Normal muscle tissue<br><input type="checkbox"/> Not sure |

TSCC Sample #13

| Generated H&E images                                                                | Pathologist #1                                                                                                                 | Pathologist #2                                                                                                                 | Pathologist #3                                                                                                                 |
|-------------------------------------------------------------------------------------|--------------------------------------------------------------------------------------------------------------------------------|--------------------------------------------------------------------------------------------------------------------------------|--------------------------------------------------------------------------------------------------------------------------------|
| 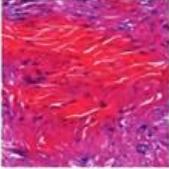   | <input checked="" type="checkbox"/> TSCC<br><input type="checkbox"/> Normal muscle tissue<br><input type="checkbox"/> Not sure | <input checked="" type="checkbox"/> TSCC<br><input type="checkbox"/> Normal muscle tissue<br><input type="checkbox"/> Not sure | <input type="checkbox"/> TSCC<br><input type="checkbox"/> Normal muscle tissue<br><input checked="" type="checkbox"/> Not sure |
|    | <input checked="" type="checkbox"/> TSCC<br><input type="checkbox"/> Normal muscle tissue<br><input type="checkbox"/> Not sure | <input type="checkbox"/> TSCC<br><input type="checkbox"/> Normal muscle tissue<br><input checked="" type="checkbox"/> Not sure | <input checked="" type="checkbox"/> TSCC<br><input type="checkbox"/> Normal muscle tissue<br><input type="checkbox"/> Not sure |
|    | <input checked="" type="checkbox"/> TSCC<br><input type="checkbox"/> Normal muscle tissue<br><input type="checkbox"/> Not sure | <input type="checkbox"/> TSCC<br><input type="checkbox"/> Normal muscle tissue<br><input checked="" type="checkbox"/> Not sure | <input checked="" type="checkbox"/> TSCC<br><input type="checkbox"/> Normal muscle tissue<br><input type="checkbox"/> Not sure |
|   | <input checked="" type="checkbox"/> TSCC<br><input type="checkbox"/> Normal muscle tissue<br><input type="checkbox"/> Not sure | <input checked="" type="checkbox"/> TSCC<br><input type="checkbox"/> Normal muscle tissue<br><input type="checkbox"/> Not sure | <input checked="" type="checkbox"/> TSCC<br><input type="checkbox"/> Normal muscle tissue<br><input type="checkbox"/> Not sure |
|  | <input checked="" type="checkbox"/> TSCC<br><input type="checkbox"/> Normal muscle tissue<br><input type="checkbox"/> Not sure | <input checked="" type="checkbox"/> TSCC<br><input type="checkbox"/> Normal muscle tissue<br><input type="checkbox"/> Not sure | <input checked="" type="checkbox"/> TSCC<br><input type="checkbox"/> Normal muscle tissue<br><input type="checkbox"/> Not sure |
|  | <input checked="" type="checkbox"/> TSCC<br><input type="checkbox"/> Normal muscle tissue<br><input type="checkbox"/> Not sure | <input checked="" type="checkbox"/> TSCC<br><input type="checkbox"/> Normal muscle tissue<br><input type="checkbox"/> Not sure | <input checked="" type="checkbox"/> TSCC<br><input type="checkbox"/> Normal muscle tissue<br><input type="checkbox"/> Not sure |
|  | <input checked="" type="checkbox"/> TSCC<br><input type="checkbox"/> Normal muscle tissue<br><input type="checkbox"/> Not sure | <input checked="" type="checkbox"/> TSCC<br><input type="checkbox"/> Normal muscle tissue<br><input type="checkbox"/> Not sure | <input checked="" type="checkbox"/> TSCC<br><input type="checkbox"/> Normal muscle tissue<br><input type="checkbox"/> Not sure |
|  | <input checked="" type="checkbox"/> TSCC<br><input type="checkbox"/> Normal muscle tissue<br><input type="checkbox"/> Not sure | <input checked="" type="checkbox"/> TSCC<br><input type="checkbox"/> Normal muscle tissue<br><input type="checkbox"/> Not sure | <input checked="" type="checkbox"/> TSCC<br><input type="checkbox"/> Normal muscle tissue<br><input type="checkbox"/> Not sure |



TSCC Sample #14

| Generated H&E images                                                                | Pathologist #1                                                                                                                 | Pathologist #2                                                                                                                 | Pathologist #3                                                                                                                 |
|-------------------------------------------------------------------------------------|--------------------------------------------------------------------------------------------------------------------------------|--------------------------------------------------------------------------------------------------------------------------------|--------------------------------------------------------------------------------------------------------------------------------|
|    | <input type="checkbox"/> TSCC<br><input checked="" type="checkbox"/> Normal muscle tissue<br><input type="checkbox"/> Not sure | <input type="checkbox"/> TSCC<br><input type="checkbox"/> Normal muscle tissue<br><input checked="" type="checkbox"/> Not sure | <input type="checkbox"/> TSCC<br><input checked="" type="checkbox"/> Normal muscle tissue<br><input type="checkbox"/> Not sure |
|    | <input type="checkbox"/> TSCC<br><input checked="" type="checkbox"/> Normal muscle tissue<br><input type="checkbox"/> Not sure | <input type="checkbox"/> TSCC<br><input type="checkbox"/> Normal muscle tissue<br><input checked="" type="checkbox"/> Not sure | <input type="checkbox"/> TSCC<br><input checked="" type="checkbox"/> Normal muscle tissue<br><input type="checkbox"/> Not sure |
|    | <input checked="" type="checkbox"/> TSCC<br><input type="checkbox"/> Normal muscle tissue<br><input type="checkbox"/> Not sure | <input type="checkbox"/> TSCC<br><input type="checkbox"/> Normal muscle tissue<br><input checked="" type="checkbox"/> Not sure | <input checked="" type="checkbox"/> TSCC<br><input type="checkbox"/> Normal muscle tissue<br><input type="checkbox"/> Not sure |
|   | <input checked="" type="checkbox"/> TSCC<br><input type="checkbox"/> Normal muscle tissue<br><input type="checkbox"/> Not sure | <input checked="" type="checkbox"/> TSCC<br><input type="checkbox"/> Normal muscle tissue<br><input type="checkbox"/> Not sure | <input checked="" type="checkbox"/> TSCC<br><input type="checkbox"/> Normal muscle tissue<br><input type="checkbox"/> Not sure |
|  | <input checked="" type="checkbox"/> TSCC<br><input type="checkbox"/> Normal muscle tissue<br><input type="checkbox"/> Not sure | <input type="checkbox"/> TSCC<br><input type="checkbox"/> Normal muscle tissue<br><input checked="" type="checkbox"/> Not sure | <input type="checkbox"/> TSCC<br><input type="checkbox"/> Normal muscle tissue<br><input checked="" type="checkbox"/> Not sure |
|  | <input type="checkbox"/> TSCC<br><input checked="" type="checkbox"/> Normal muscle tissue<br><input type="checkbox"/> Not sure | <input type="checkbox"/> TSCC<br><input checked="" type="checkbox"/> Normal muscle tissue<br><input type="checkbox"/> Not sure | <input type="checkbox"/> TSCC<br><input checked="" type="checkbox"/> Normal muscle tissue<br><input type="checkbox"/> Not sure |
|  | <input type="checkbox"/> TSCC<br><input checked="" type="checkbox"/> Normal muscle tissue<br><input type="checkbox"/> Not sure | <input type="checkbox"/> TSCC<br><input checked="" type="checkbox"/> Normal muscle tissue<br><input type="checkbox"/> Not sure | <input type="checkbox"/> TSCC<br><input checked="" type="checkbox"/> Normal muscle tissue<br><input type="checkbox"/> Not sure |
|  | <input type="checkbox"/> TSCC<br><input checked="" type="checkbox"/> Normal muscle tissue<br><input type="checkbox"/> Not sure | <input type="checkbox"/> TSCC<br><input checked="" type="checkbox"/> Normal muscle tissue<br><input type="checkbox"/> Not sure | <input type="checkbox"/> TSCC<br><input checked="" type="checkbox"/> Normal muscle tissue<br><input type="checkbox"/> Not sure |

TSCC Sample #15

| Generated H&E images                                                                | Pathologist #1                                                                                                                 | Pathologist #2                                                                                                                 | Pathologist #3                                                                                                                 |
|-------------------------------------------------------------------------------------|--------------------------------------------------------------------------------------------------------------------------------|--------------------------------------------------------------------------------------------------------------------------------|--------------------------------------------------------------------------------------------------------------------------------|
| 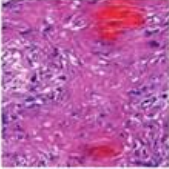   | <input checked="" type="checkbox"/> TSCC<br><input type="checkbox"/> Normal muscle tissue<br><input type="checkbox"/> Not sure | <input checked="" type="checkbox"/> TSCC<br><input type="checkbox"/> Normal muscle tissue<br><input type="checkbox"/> Not sure | <input checked="" type="checkbox"/> TSCC<br><input type="checkbox"/> Normal muscle tissue<br><input type="checkbox"/> Not sure |
|    | <input checked="" type="checkbox"/> TSCC<br><input type="checkbox"/> Normal muscle tissue<br><input type="checkbox"/> Not sure | <input checked="" type="checkbox"/> TSCC<br><input type="checkbox"/> Normal muscle tissue<br><input type="checkbox"/> Not sure | <input checked="" type="checkbox"/> TSCC<br><input type="checkbox"/> Normal muscle tissue<br><input type="checkbox"/> Not sure |
|    | <input checked="" type="checkbox"/> TSCC<br><input type="checkbox"/> Normal muscle tissue<br><input type="checkbox"/> Not sure | <input checked="" type="checkbox"/> TSCC<br><input type="checkbox"/> Normal muscle tissue<br><input type="checkbox"/> Not sure | <input checked="" type="checkbox"/> TSCC<br><input type="checkbox"/> Normal muscle tissue<br><input type="checkbox"/> Not sure |
|   | <input checked="" type="checkbox"/> TSCC<br><input type="checkbox"/> Normal muscle tissue<br><input type="checkbox"/> Not sure | <input checked="" type="checkbox"/> TSCC<br><input type="checkbox"/> Normal muscle tissue<br><input type="checkbox"/> Not sure | <input checked="" type="checkbox"/> TSCC<br><input type="checkbox"/> Normal muscle tissue<br><input type="checkbox"/> Not sure |
|  | <input checked="" type="checkbox"/> TSCC<br><input type="checkbox"/> Normal muscle tissue<br><input type="checkbox"/> Not sure | <input checked="" type="checkbox"/> TSCC<br><input type="checkbox"/> Normal muscle tissue<br><input type="checkbox"/> Not sure | <input checked="" type="checkbox"/> TSCC<br><input type="checkbox"/> Normal muscle tissue<br><input type="checkbox"/> Not sure |
|  | <input checked="" type="checkbox"/> TSCC<br><input type="checkbox"/> Normal muscle tissue<br><input type="checkbox"/> Not sure | <input type="checkbox"/> TSCC<br><input type="checkbox"/> Normal muscle tissue<br><input checked="" type="checkbox"/> Not sure | <input checked="" type="checkbox"/> TSCC<br><input type="checkbox"/> Normal muscle tissue<br><input type="checkbox"/> Not sure |
|  | <input checked="" type="checkbox"/> TSCC<br><input type="checkbox"/> Normal muscle tissue<br><input type="checkbox"/> Not sure | <input checked="" type="checkbox"/> TSCC<br><input type="checkbox"/> Normal muscle tissue<br><input type="checkbox"/> Not sure | <input checked="" type="checkbox"/> TSCC<br><input type="checkbox"/> Normal muscle tissue<br><input type="checkbox"/> Not sure |
|  | <input checked="" type="checkbox"/> TSCC<br><input type="checkbox"/> Normal muscle tissue<br><input type="checkbox"/> Not sure | <input checked="" type="checkbox"/> TSCC<br><input type="checkbox"/> Normal muscle tissue<br><input type="checkbox"/> Not sure | <input checked="" type="checkbox"/> TSCC<br><input type="checkbox"/> Normal muscle tissue<br><input type="checkbox"/> Not sure |

### Normal Sample #1

| Generated H&E images                                                                | Pathologist #1                                                                                                                 | Pathologist #2                                                                                                                 | Pathologist #3                                                                                                                 |
|-------------------------------------------------------------------------------------|--------------------------------------------------------------------------------------------------------------------------------|--------------------------------------------------------------------------------------------------------------------------------|--------------------------------------------------------------------------------------------------------------------------------|
| 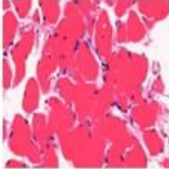   | <input type="checkbox"/> TSCC<br><input checked="" type="checkbox"/> Normal muscle tissue<br><input type="checkbox"/> Not sure | <input type="checkbox"/> TSCC<br><input checked="" type="checkbox"/> Normal muscle tissue<br><input type="checkbox"/> Not sure | <input type="checkbox"/> TSCC<br><input checked="" type="checkbox"/> Normal muscle tissue<br><input type="checkbox"/> Not sure |
|    | <input type="checkbox"/> TSCC<br><input checked="" type="checkbox"/> Normal muscle tissue<br><input type="checkbox"/> Not sure | <input type="checkbox"/> TSCC<br><input checked="" type="checkbox"/> Normal muscle tissue<br><input type="checkbox"/> Not sure | <input type="checkbox"/> TSCC<br><input checked="" type="checkbox"/> Normal muscle tissue<br><input type="checkbox"/> Not sure |
|    | <input type="checkbox"/> TSCC<br><input checked="" type="checkbox"/> Normal muscle tissue<br><input type="checkbox"/> Not sure | <input type="checkbox"/> TSCC<br><input checked="" type="checkbox"/> Normal muscle tissue<br><input type="checkbox"/> Not sure | <input type="checkbox"/> TSCC<br><input checked="" type="checkbox"/> Normal muscle tissue<br><input type="checkbox"/> Not sure |
|   | <input type="checkbox"/> TSCC<br><input checked="" type="checkbox"/> Normal muscle tissue<br><input type="checkbox"/> Not sure | <input type="checkbox"/> TSCC<br><input checked="" type="checkbox"/> Normal muscle tissue<br><input type="checkbox"/> Not sure | <input type="checkbox"/> TSCC<br><input checked="" type="checkbox"/> Normal muscle tissue<br><input type="checkbox"/> Not sure |
|  | <input type="checkbox"/> TSCC<br><input checked="" type="checkbox"/> Normal muscle tissue<br><input type="checkbox"/> Not sure | <input type="checkbox"/> TSCC<br><input checked="" type="checkbox"/> Normal muscle tissue<br><input type="checkbox"/> Not sure | <input type="checkbox"/> TSCC<br><input checked="" type="checkbox"/> Normal muscle tissue<br><input type="checkbox"/> Not sure |
|  | <input type="checkbox"/> TSCC<br><input checked="" type="checkbox"/> Normal muscle tissue<br><input type="checkbox"/> Not sure | <input type="checkbox"/> TSCC<br><input checked="" type="checkbox"/> Normal muscle tissue<br><input type="checkbox"/> Not sure | <input type="checkbox"/> TSCC<br><input checked="" type="checkbox"/> Normal muscle tissue<br><input type="checkbox"/> Not sure |
|  | <input type="checkbox"/> TSCC<br><input type="checkbox"/> Normal muscle tissue<br><input checked="" type="checkbox"/> Not sure | <input type="checkbox"/> TSCC<br><input type="checkbox"/> Normal muscle tissue<br><input checked="" type="checkbox"/> Not sure | <input checked="" type="checkbox"/> TSCC<br><input type="checkbox"/> Normal muscle tissue<br><input type="checkbox"/> Not sure |
|  | <input type="checkbox"/> TSCC<br><input checked="" type="checkbox"/> Normal muscle tissue<br><input type="checkbox"/> Not sure | <input type="checkbox"/> TSCC<br><input checked="" type="checkbox"/> Normal muscle tissue<br><input type="checkbox"/> Not sure | <input type="checkbox"/> TSCC<br><input checked="" type="checkbox"/> Normal muscle tissue<br><input type="checkbox"/> Not sure |



### Normal Sample #2

| Generated H&E images                                                                | Pathologist #1                                                                                                                 | Pathologist #2                                                                                                                 | Pathologist #3                                                                                                                 |
|-------------------------------------------------------------------------------------|--------------------------------------------------------------------------------------------------------------------------------|--------------------------------------------------------------------------------------------------------------------------------|--------------------------------------------------------------------------------------------------------------------------------|
|    | <input type="checkbox"/> TSCC<br><input checked="" type="checkbox"/> Normal muscle tissue<br><input type="checkbox"/> Not sure | <input type="checkbox"/> TSCC<br><input checked="" type="checkbox"/> Normal muscle tissue<br><input type="checkbox"/> Not sure | <input type="checkbox"/> TSCC<br><input checked="" type="checkbox"/> Normal muscle tissue<br><input type="checkbox"/> Not sure |
|    | <input type="checkbox"/> TSCC<br><input checked="" type="checkbox"/> Normal muscle tissue<br><input type="checkbox"/> Not sure | <input type="checkbox"/> TSCC<br><input checked="" type="checkbox"/> Normal muscle tissue<br><input type="checkbox"/> Not sure | <input type="checkbox"/> TSCC<br><input checked="" type="checkbox"/> Normal muscle tissue<br><input type="checkbox"/> Not sure |
|    | <input type="checkbox"/> TSCC<br><input checked="" type="checkbox"/> Normal muscle tissue<br><input type="checkbox"/> Not sure | <input type="checkbox"/> TSCC<br><input checked="" type="checkbox"/> Normal muscle tissue<br><input type="checkbox"/> Not sure | <input type="checkbox"/> TSCC<br><input checked="" type="checkbox"/> Normal muscle tissue<br><input type="checkbox"/> Not sure |
|   | <input type="checkbox"/> TSCC<br><input checked="" type="checkbox"/> Normal muscle tissue<br><input type="checkbox"/> Not sure | <input type="checkbox"/> TSCC<br><input type="checkbox"/> Normal muscle tissue<br><input checked="" type="checkbox"/> Not sure | <input type="checkbox"/> TSCC<br><input checked="" type="checkbox"/> Normal muscle tissue<br><input type="checkbox"/> Not sure |
|  | <input type="checkbox"/> TSCC<br><input checked="" type="checkbox"/> Normal muscle tissue<br><input type="checkbox"/> Not sure | <input type="checkbox"/> TSCC<br><input checked="" type="checkbox"/> Normal muscle tissue<br><input type="checkbox"/> Not sure | <input type="checkbox"/> TSCC<br><input checked="" type="checkbox"/> Normal muscle tissue<br><input type="checkbox"/> Not sure |
|  | <input type="checkbox"/> TSCC<br><input checked="" type="checkbox"/> Normal muscle tissue<br><input type="checkbox"/> Not sure | <input type="checkbox"/> TSCC<br><input checked="" type="checkbox"/> Normal muscle tissue<br><input type="checkbox"/> Not sure | <input type="checkbox"/> TSCC<br><input checked="" type="checkbox"/> Normal muscle tissue<br><input type="checkbox"/> Not sure |
|  | <input type="checkbox"/> TSCC<br><input checked="" type="checkbox"/> Normal muscle tissue<br><input type="checkbox"/> Not sure | <input type="checkbox"/> TSCC<br><input checked="" type="checkbox"/> Normal muscle tissue<br><input type="checkbox"/> Not sure | <input type="checkbox"/> TSCC<br><input checked="" type="checkbox"/> Normal muscle tissue<br><input type="checkbox"/> Not sure |
|  | <input checked="" type="checkbox"/> TSCC<br><input type="checkbox"/> Normal muscle tissue<br><input type="checkbox"/> Not sure | <input type="checkbox"/> TSCC<br><input type="checkbox"/> Normal muscle tissue<br><input checked="" type="checkbox"/> Not sure | <input checked="" type="checkbox"/> TSCC<br><input type="checkbox"/> Normal muscle tissue<br><input type="checkbox"/> Not sure |

### Normal Sample #3

| Generated H&E images                                                                | Pathologist #1                                                                                                                 | Pathologist #2                                                                                                                 | Pathologist #3                                                                                                                 |
|-------------------------------------------------------------------------------------|--------------------------------------------------------------------------------------------------------------------------------|--------------------------------------------------------------------------------------------------------------------------------|--------------------------------------------------------------------------------------------------------------------------------|
| 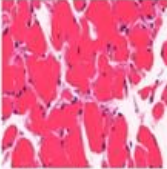   | <input type="checkbox"/> TSCC<br><input checked="" type="checkbox"/> Normal muscle tissue<br><input type="checkbox"/> Not sure | <input type="checkbox"/> TSCC<br><input checked="" type="checkbox"/> Normal muscle tissue<br><input type="checkbox"/> Not sure | <input type="checkbox"/> TSCC<br><input checked="" type="checkbox"/> Normal muscle tissue<br><input type="checkbox"/> Not sure |
|    | <input type="checkbox"/> TSCC<br><input checked="" type="checkbox"/> Normal muscle tissue<br><input type="checkbox"/> Not sure | <input type="checkbox"/> TSCC<br><input checked="" type="checkbox"/> Normal muscle tissue<br><input type="checkbox"/> Not sure | <input type="checkbox"/> TSCC<br><input checked="" type="checkbox"/> Normal muscle tissue<br><input type="checkbox"/> Not sure |
|    | <input type="checkbox"/> TSCC<br><input checked="" type="checkbox"/> Normal muscle tissue<br><input type="checkbox"/> Not sure | <input type="checkbox"/> TSCC<br><input checked="" type="checkbox"/> Normal muscle tissue<br><input type="checkbox"/> Not sure | <input type="checkbox"/> TSCC<br><input checked="" type="checkbox"/> Normal muscle tissue<br><input type="checkbox"/> Not sure |
|   | <input checked="" type="checkbox"/> TSCC<br><input type="checkbox"/> Normal muscle tissue<br><input type="checkbox"/> Not sure | <input type="checkbox"/> TSCC<br><input type="checkbox"/> Normal muscle tissue<br><input checked="" type="checkbox"/> Not sure | <input checked="" type="checkbox"/> TSCC<br><input type="checkbox"/> Normal muscle tissue<br><input type="checkbox"/> Not sure |
|  | <input type="checkbox"/> TSCC<br><input checked="" type="checkbox"/> Normal muscle tissue<br><input type="checkbox"/> Not sure | <input type="checkbox"/> TSCC<br><input checked="" type="checkbox"/> Normal muscle tissue<br><input type="checkbox"/> Not sure | <input type="checkbox"/> TSCC<br><input checked="" type="checkbox"/> Normal muscle tissue<br><input type="checkbox"/> Not sure |
|  | <input type="checkbox"/> TSCC<br><input checked="" type="checkbox"/> Normal muscle tissue<br><input type="checkbox"/> Not sure | <input type="checkbox"/> TSCC<br><input checked="" type="checkbox"/> Normal muscle tissue<br><input type="checkbox"/> Not sure | <input type="checkbox"/> TSCC<br><input checked="" type="checkbox"/> Normal muscle tissue<br><input type="checkbox"/> Not sure |
|  | <input type="checkbox"/> TSCC<br><input checked="" type="checkbox"/> Normal muscle tissue<br><input type="checkbox"/> Not sure | <input type="checkbox"/> TSCC<br><input checked="" type="checkbox"/> Normal muscle tissue<br><input type="checkbox"/> Not sure | <input type="checkbox"/> TSCC<br><input checked="" type="checkbox"/> Normal muscle tissue<br><input type="checkbox"/> Not sure |
|  | <input type="checkbox"/> TSCC<br><input checked="" type="checkbox"/> Normal muscle tissue<br><input type="checkbox"/> Not sure | <input type="checkbox"/> TSCC<br><input checked="" type="checkbox"/> Normal muscle tissue<br><input type="checkbox"/> Not sure | <input type="checkbox"/> TSCC<br><input checked="" type="checkbox"/> Normal muscle tissue<br><input type="checkbox"/> Not sure |



### Normal Sample #4

| Generated H&E images                                                                | Pathologist #1                                                                                                                 | Pathologist #2                                                                                                                 | Pathologist #3                                                                                                                 |
|-------------------------------------------------------------------------------------|--------------------------------------------------------------------------------------------------------------------------------|--------------------------------------------------------------------------------------------------------------------------------|--------------------------------------------------------------------------------------------------------------------------------|
|    | <input type="checkbox"/> TSCC<br><input checked="" type="checkbox"/> Normal muscle tissue<br><input type="checkbox"/> Not sure | <input type="checkbox"/> TSCC<br><input checked="" type="checkbox"/> Normal muscle tissue<br><input type="checkbox"/> Not sure | <input type="checkbox"/> TSCC<br><input checked="" type="checkbox"/> Normal muscle tissue<br><input type="checkbox"/> Not sure |
|    | <input type="checkbox"/> TSCC<br><input checked="" type="checkbox"/> Normal muscle tissue<br><input type="checkbox"/> Not sure | <input type="checkbox"/> TSCC<br><input checked="" type="checkbox"/> Normal muscle tissue<br><input type="checkbox"/> Not sure | <input type="checkbox"/> TSCC<br><input checked="" type="checkbox"/> Normal muscle tissue<br><input type="checkbox"/> Not sure |
|    | <input type="checkbox"/> TSCC<br><input checked="" type="checkbox"/> Normal muscle tissue<br><input type="checkbox"/> Not sure | <input type="checkbox"/> TSCC<br><input checked="" type="checkbox"/> Normal muscle tissue<br><input type="checkbox"/> Not sure | <input type="checkbox"/> TSCC<br><input checked="" type="checkbox"/> Normal muscle tissue<br><input type="checkbox"/> Not sure |
|   | <input type="checkbox"/> TSCC<br><input checked="" type="checkbox"/> Normal muscle tissue<br><input type="checkbox"/> Not sure | <input type="checkbox"/> TSCC<br><input checked="" type="checkbox"/> Normal muscle tissue<br><input type="checkbox"/> Not sure | <input type="checkbox"/> TSCC<br><input checked="" type="checkbox"/> Normal muscle tissue<br><input type="checkbox"/> Not sure |
|  | <input type="checkbox"/> TSCC<br><input checked="" type="checkbox"/> Normal muscle tissue<br><input type="checkbox"/> Not sure | <input type="checkbox"/> TSCC<br><input checked="" type="checkbox"/> Normal muscle tissue<br><input type="checkbox"/> Not sure | <input type="checkbox"/> TSCC<br><input checked="" type="checkbox"/> Normal muscle tissue<br><input type="checkbox"/> Not sure |
|  | <input type="checkbox"/> TSCC<br><input checked="" type="checkbox"/> Normal muscle tissue<br><input type="checkbox"/> Not sure | <input type="checkbox"/> TSCC<br><input checked="" type="checkbox"/> Normal muscle tissue<br><input type="checkbox"/> Not sure | <input type="checkbox"/> TSCC<br><input checked="" type="checkbox"/> Normal muscle tissue<br><input type="checkbox"/> Not sure |
|  | <input type="checkbox"/> TSCC<br><input checked="" type="checkbox"/> Normal muscle tissue<br><input type="checkbox"/> Not sure | <input type="checkbox"/> TSCC<br><input checked="" type="checkbox"/> Normal muscle tissue<br><input type="checkbox"/> Not sure | <input type="checkbox"/> TSCC<br><input checked="" type="checkbox"/> Normal muscle tissue<br><input type="checkbox"/> Not sure |
|  | <input type="checkbox"/> TSCC<br><input checked="" type="checkbox"/> Normal muscle tissue<br><input type="checkbox"/> Not sure | <input type="checkbox"/> TSCC<br><input checked="" type="checkbox"/> Normal muscle tissue<br><input type="checkbox"/> Not sure | <input type="checkbox"/> TSCC<br><input checked="" type="checkbox"/> Normal muscle tissue<br><input type="checkbox"/> Not sure |

### Normal Sample #5

| Generated H&E images                                                                | Pathologist #1                                                                                                                 | Pathologist #2                                                                                                                 | Pathologist #3                                                                                                                 |
|-------------------------------------------------------------------------------------|--------------------------------------------------------------------------------------------------------------------------------|--------------------------------------------------------------------------------------------------------------------------------|--------------------------------------------------------------------------------------------------------------------------------|
|    | <input type="checkbox"/> TSCC<br><input checked="" type="checkbox"/> Normal muscle tissue<br><input type="checkbox"/> Not sure | <input type="checkbox"/> TSCC<br><input checked="" type="checkbox"/> Normal muscle tissue<br><input type="checkbox"/> Not sure | <input type="checkbox"/> TSCC<br><input checked="" type="checkbox"/> Normal muscle tissue<br><input type="checkbox"/> Not sure |
|    | <input type="checkbox"/> TSCC<br><input checked="" type="checkbox"/> Normal muscle tissue<br><input type="checkbox"/> Not sure | <input type="checkbox"/> TSCC<br><input checked="" type="checkbox"/> Normal muscle tissue<br><input type="checkbox"/> Not sure | <input type="checkbox"/> TSCC<br><input checked="" type="checkbox"/> Normal muscle tissue<br><input type="checkbox"/> Not sure |
|    | <input type="checkbox"/> TSCC<br><input checked="" type="checkbox"/> Normal muscle tissue<br><input type="checkbox"/> Not sure | <input type="checkbox"/> TSCC<br><input checked="" type="checkbox"/> Normal muscle tissue<br><input type="checkbox"/> Not sure | <input type="checkbox"/> TSCC<br><input checked="" type="checkbox"/> Normal muscle tissue<br><input type="checkbox"/> Not sure |
|   | <input type="checkbox"/> TSCC<br><input checked="" type="checkbox"/> Normal muscle tissue<br><input type="checkbox"/> Not sure | <input type="checkbox"/> TSCC<br><input checked="" type="checkbox"/> Normal muscle tissue<br><input type="checkbox"/> Not sure | <input type="checkbox"/> TSCC<br><input checked="" type="checkbox"/> Normal muscle tissue<br><input type="checkbox"/> Not sure |
|  | <input type="checkbox"/> TSCC<br><input checked="" type="checkbox"/> Normal muscle tissue<br><input type="checkbox"/> Not sure | <input type="checkbox"/> TSCC<br><input checked="" type="checkbox"/> Normal muscle tissue<br><input type="checkbox"/> Not sure | <input type="checkbox"/> TSCC<br><input checked="" type="checkbox"/> Normal muscle tissue<br><input type="checkbox"/> Not sure |
|  | <input type="checkbox"/> TSCC<br><input checked="" type="checkbox"/> Normal muscle tissue<br><input type="checkbox"/> Not sure | <input type="checkbox"/> TSCC<br><input checked="" type="checkbox"/> Normal muscle tissue<br><input type="checkbox"/> Not sure | <input type="checkbox"/> TSCC<br><input checked="" type="checkbox"/> Normal muscle tissue<br><input type="checkbox"/> Not sure |
|  | <input type="checkbox"/> TSCC<br><input checked="" type="checkbox"/> Normal muscle tissue<br><input type="checkbox"/> Not sure | <input type="checkbox"/> TSCC<br><input checked="" type="checkbox"/> Normal muscle tissue<br><input type="checkbox"/> Not sure | <input type="checkbox"/> TSCC<br><input checked="" type="checkbox"/> Normal muscle tissue<br><input type="checkbox"/> Not sure |
|  | <input type="checkbox"/> TSCC<br><input checked="" type="checkbox"/> Normal muscle tissue<br><input type="checkbox"/> Not sure | <input type="checkbox"/> TSCC<br><input checked="" type="checkbox"/> Normal muscle tissue<br><input type="checkbox"/> Not sure | <input type="checkbox"/> TSCC<br><input checked="" type="checkbox"/> Normal muscle tissue<br><input type="checkbox"/> Not sure |

# Normal Sample #6

| Generated H&E images                                                                | Pathologist #1                                                                                                                 | Pathologist #2                                                                                                                 | Pathologist #3                                                                                                                 |
|-------------------------------------------------------------------------------------|--------------------------------------------------------------------------------------------------------------------------------|--------------------------------------------------------------------------------------------------------------------------------|--------------------------------------------------------------------------------------------------------------------------------|
| 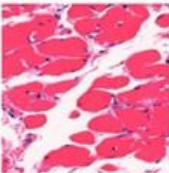   | <input type="checkbox"/> TSCC<br><input checked="" type="checkbox"/> Normal muscle tissue<br><input type="checkbox"/> Not sure | <input type="checkbox"/> TSCC<br><input checked="" type="checkbox"/> Normal muscle tissue<br><input type="checkbox"/> Not sure | <input type="checkbox"/> TSCC<br><input checked="" type="checkbox"/> Normal muscle tissue<br><input type="checkbox"/> Not sure |
|    | <input type="checkbox"/> TSCC<br><input checked="" type="checkbox"/> Normal muscle tissue<br><input type="checkbox"/> Not sure | <input type="checkbox"/> TSCC<br><input checked="" type="checkbox"/> Normal muscle tissue<br><input type="checkbox"/> Not sure | <input type="checkbox"/> TSCC<br><input checked="" type="checkbox"/> Normal muscle tissue<br><input type="checkbox"/> Not sure |
|    | <input type="checkbox"/> TSCC<br><input checked="" type="checkbox"/> Normal muscle tissue<br><input type="checkbox"/> Not sure | <input type="checkbox"/> TSCC<br><input checked="" type="checkbox"/> Normal muscle tissue<br><input type="checkbox"/> Not sure | <input type="checkbox"/> TSCC<br><input checked="" type="checkbox"/> Normal muscle tissue<br><input type="checkbox"/> Not sure |
|   | <input type="checkbox"/> TSCC<br><input checked="" type="checkbox"/> Normal muscle tissue<br><input type="checkbox"/> Not sure | <input type="checkbox"/> TSCC<br><input checked="" type="checkbox"/> Normal muscle tissue<br><input type="checkbox"/> Not sure | <input type="checkbox"/> TSCC<br><input checked="" type="checkbox"/> Normal muscle tissue<br><input type="checkbox"/> Not sure |
|  | <input type="checkbox"/> TSCC<br><input checked="" type="checkbox"/> Normal muscle tissue<br><input type="checkbox"/> Not sure | <input type="checkbox"/> TSCC<br><input checked="" type="checkbox"/> Normal muscle tissue<br><input type="checkbox"/> Not sure | <input type="checkbox"/> TSCC<br><input checked="" type="checkbox"/> Normal muscle tissue<br><input type="checkbox"/> Not sure |
|  | <input type="checkbox"/> TSCC<br><input checked="" type="checkbox"/> Normal muscle tissue<br><input type="checkbox"/> Not sure | <input type="checkbox"/> TSCC<br><input checked="" type="checkbox"/> Normal muscle tissue<br><input type="checkbox"/> Not sure | <input type="checkbox"/> TSCC<br><input checked="" type="checkbox"/> Normal muscle tissue<br><input type="checkbox"/> Not sure |
|  | <input type="checkbox"/> TSCC<br><input checked="" type="checkbox"/> Normal muscle tissue<br><input type="checkbox"/> Not sure | <input type="checkbox"/> TSCC<br><input checked="" type="checkbox"/> Normal muscle tissue<br><input type="checkbox"/> Not sure | <input type="checkbox"/> TSCC<br><input checked="" type="checkbox"/> Normal muscle tissue<br><input type="checkbox"/> Not sure |
|  | <input type="checkbox"/> TSCC<br><input checked="" type="checkbox"/> Normal muscle tissue<br><input type="checkbox"/> Not sure | <input type="checkbox"/> TSCC<br><input checked="" type="checkbox"/> Normal muscle tissue<br><input type="checkbox"/> Not sure | <input type="checkbox"/> TSCC<br><input checked="" type="checkbox"/> Normal muscle tissue<br><input type="checkbox"/> Not sure |



### Normal Sample #7

| Generated H&E images                                                                | Pathologist #1                                                                                                                 | Pathologist #2                                                                                                                 | Pathologist #3                                                                                                                 |
|-------------------------------------------------------------------------------------|--------------------------------------------------------------------------------------------------------------------------------|--------------------------------------------------------------------------------------------------------------------------------|--------------------------------------------------------------------------------------------------------------------------------|
|    | <input type="checkbox"/> TSCC<br><input checked="" type="checkbox"/> Normal muscle tissue<br><input type="checkbox"/> Not sure | <input type="checkbox"/> TSCC<br><input checked="" type="checkbox"/> Normal muscle tissue<br><input type="checkbox"/> Not sure | <input type="checkbox"/> TSCC<br><input checked="" type="checkbox"/> Normal muscle tissue<br><input type="checkbox"/> Not sure |
|    | <input type="checkbox"/> TSCC<br><input checked="" type="checkbox"/> Normal muscle tissue<br><input type="checkbox"/> Not sure | <input type="checkbox"/> TSCC<br><input checked="" type="checkbox"/> Normal muscle tissue<br><input type="checkbox"/> Not sure | <input type="checkbox"/> TSCC<br><input checked="" type="checkbox"/> Normal muscle tissue<br><input type="checkbox"/> Not sure |
|    | <input type="checkbox"/> TSCC<br><input checked="" type="checkbox"/> Normal muscle tissue<br><input type="checkbox"/> Not sure | <input type="checkbox"/> TSCC<br><input checked="" type="checkbox"/> Normal muscle tissue<br><input type="checkbox"/> Not sure | <input type="checkbox"/> TSCC<br><input checked="" type="checkbox"/> Normal muscle tissue<br><input type="checkbox"/> Not sure |
|   | <input type="checkbox"/> TSCC<br><input checked="" type="checkbox"/> Normal muscle tissue<br><input type="checkbox"/> Not sure | <input type="checkbox"/> TSCC<br><input checked="" type="checkbox"/> Normal muscle tissue<br><input type="checkbox"/> Not sure | <input type="checkbox"/> TSCC<br><input checked="" type="checkbox"/> Normal muscle tissue<br><input type="checkbox"/> Not sure |
|  | <input type="checkbox"/> TSCC<br><input checked="" type="checkbox"/> Normal muscle tissue<br><input type="checkbox"/> Not sure | <input type="checkbox"/> TSCC<br><input checked="" type="checkbox"/> Normal muscle tissue<br><input type="checkbox"/> Not sure | <input type="checkbox"/> TSCC<br><input checked="" type="checkbox"/> Normal muscle tissue<br><input type="checkbox"/> Not sure |
|  | <input checked="" type="checkbox"/> TSCC<br><input type="checkbox"/> Normal muscle tissue<br><input type="checkbox"/> Not sure | <input checked="" type="checkbox"/> TSCC<br><input type="checkbox"/> Normal muscle tissue<br><input type="checkbox"/> Not sure | <input type="checkbox"/> TSCC<br><input type="checkbox"/> Normal muscle tissue<br><input checked="" type="checkbox"/> Not sure |
|  | <input type="checkbox"/> TSCC<br><input checked="" type="checkbox"/> Normal muscle tissue<br><input type="checkbox"/> Not sure | <input type="checkbox"/> TSCC<br><input checked="" type="checkbox"/> Normal muscle tissue<br><input type="checkbox"/> Not sure | <input type="checkbox"/> TSCC<br><input checked="" type="checkbox"/> Normal muscle tissue<br><input type="checkbox"/> Not sure |
|  | <input type="checkbox"/> TSCC<br><input checked="" type="checkbox"/> Normal muscle tissue<br><input type="checkbox"/> Not sure | <input type="checkbox"/> TSCC<br><input checked="" type="checkbox"/> Normal muscle tissue<br><input type="checkbox"/> Not sure | <input type="checkbox"/> TSCC<br><input checked="" type="checkbox"/> Normal muscle tissue<br><input type="checkbox"/> Not sure |

### Normal Sample #8

| Generated H&E images                                                                | Pathologist #1                                                                                                                 | Pathologist #2                                                                                                                 | Pathologist #3                                                                                                                 |
|-------------------------------------------------------------------------------------|--------------------------------------------------------------------------------------------------------------------------------|--------------------------------------------------------------------------------------------------------------------------------|--------------------------------------------------------------------------------------------------------------------------------|
|    | <input type="checkbox"/> TSCC<br><input checked="" type="checkbox"/> Normal muscle tissue<br><input type="checkbox"/> Not sure | <input type="checkbox"/> TSCC<br><input checked="" type="checkbox"/> Normal muscle tissue<br><input type="checkbox"/> Not sure | <input type="checkbox"/> TSCC<br><input checked="" type="checkbox"/> Normal muscle tissue<br><input type="checkbox"/> Not sure |
|    | <input type="checkbox"/> TSCC<br><input checked="" type="checkbox"/> Normal muscle tissue<br><input type="checkbox"/> Not sure | <input type="checkbox"/> TSCC<br><input checked="" type="checkbox"/> Normal muscle tissue<br><input type="checkbox"/> Not sure | <input type="checkbox"/> TSCC<br><input checked="" type="checkbox"/> Normal muscle tissue<br><input type="checkbox"/> Not sure |
|    | <input checked="" type="checkbox"/> TSCC<br><input type="checkbox"/> Normal muscle tissue<br><input type="checkbox"/> Not sure | <input checked="" type="checkbox"/> TSCC<br><input type="checkbox"/> Normal muscle tissue<br><input type="checkbox"/> Not sure | <input checked="" type="checkbox"/> TSCC<br><input type="checkbox"/> Normal muscle tissue<br><input type="checkbox"/> Not sure |
|   | <input type="checkbox"/> TSCC<br><input checked="" type="checkbox"/> Normal muscle tissue<br><input type="checkbox"/> Not sure | <input type="checkbox"/> TSCC<br><input checked="" type="checkbox"/> Normal muscle tissue<br><input type="checkbox"/> Not sure | <input type="checkbox"/> TSCC<br><input checked="" type="checkbox"/> Normal muscle tissue<br><input type="checkbox"/> Not sure |
|  | <input type="checkbox"/> TSCC<br><input checked="" type="checkbox"/> Normal muscle tissue<br><input type="checkbox"/> Not sure | <input type="checkbox"/> TSCC<br><input checked="" type="checkbox"/> Normal muscle tissue<br><input type="checkbox"/> Not sure | <input type="checkbox"/> TSCC<br><input checked="" type="checkbox"/> Normal muscle tissue<br><input type="checkbox"/> Not sure |
|  | <input type="checkbox"/> TSCC<br><input checked="" type="checkbox"/> Normal muscle tissue<br><input type="checkbox"/> Not sure | <input type="checkbox"/> TSCC<br><input checked="" type="checkbox"/> Normal muscle tissue<br><input type="checkbox"/> Not sure | <input type="checkbox"/> TSCC<br><input checked="" type="checkbox"/> Normal muscle tissue<br><input type="checkbox"/> Not sure |
|  | <input type="checkbox"/> TSCC<br><input checked="" type="checkbox"/> Normal muscle tissue<br><input type="checkbox"/> Not sure | <input type="checkbox"/> TSCC<br><input checked="" type="checkbox"/> Normal muscle tissue<br><input type="checkbox"/> Not sure | <input type="checkbox"/> TSCC<br><input checked="" type="checkbox"/> Normal muscle tissue<br><input type="checkbox"/> Not sure |
|  | <input type="checkbox"/> TSCC<br><input checked="" type="checkbox"/> Normal muscle tissue<br><input type="checkbox"/> Not sure | <input type="checkbox"/> TSCC<br><input checked="" type="checkbox"/> Normal muscle tissue<br><input type="checkbox"/> Not sure | <input type="checkbox"/> TSCC<br><input checked="" type="checkbox"/> Normal muscle tissue<br><input type="checkbox"/> Not sure |



### Normal Sample #9

| Generated H&E images                                                                | Pathologist #1                                                                                                                 | Pathologist #2                                                                                                                 | Pathologist #3                                                                                                                 |
|-------------------------------------------------------------------------------------|--------------------------------------------------------------------------------------------------------------------------------|--------------------------------------------------------------------------------------------------------------------------------|--------------------------------------------------------------------------------------------------------------------------------|
|    | <input type="checkbox"/> TSCC<br><input checked="" type="checkbox"/> Normal muscle tissue<br><input type="checkbox"/> Not sure | <input type="checkbox"/> TSCC<br><input checked="" type="checkbox"/> Normal muscle tissue<br><input type="checkbox"/> Not sure | <input type="checkbox"/> TSCC<br><input checked="" type="checkbox"/> Normal muscle tissue<br><input type="checkbox"/> Not sure |
|    | <input type="checkbox"/> TSCC<br><input checked="" type="checkbox"/> Normal muscle tissue<br><input type="checkbox"/> Not sure | <input type="checkbox"/> TSCC<br><input checked="" type="checkbox"/> Normal muscle tissue<br><input type="checkbox"/> Not sure | <input type="checkbox"/> TSCC<br><input checked="" type="checkbox"/> Normal muscle tissue<br><input type="checkbox"/> Not sure |
|    | <input checked="" type="checkbox"/> TSCC<br><input type="checkbox"/> Normal muscle tissue<br><input type="checkbox"/> Not sure | <input checked="" type="checkbox"/> TSCC<br><input type="checkbox"/> Normal muscle tissue<br><input type="checkbox"/> Not sure | <input checked="" type="checkbox"/> TSCC<br><input type="checkbox"/> Normal muscle tissue<br><input type="checkbox"/> Not sure |
|   | <input type="checkbox"/> TSCC<br><input checked="" type="checkbox"/> Normal muscle tissue<br><input type="checkbox"/> Not sure | <input type="checkbox"/> TSCC<br><input checked="" type="checkbox"/> Normal muscle tissue<br><input type="checkbox"/> Not sure | <input type="checkbox"/> TSCC<br><input checked="" type="checkbox"/> Normal muscle tissue<br><input type="checkbox"/> Not sure |
|  | <input checked="" type="checkbox"/> TSCC<br><input type="checkbox"/> Normal muscle tissue<br><input type="checkbox"/> Not sure | <input checked="" type="checkbox"/> TSCC<br><input type="checkbox"/> Normal muscle tissue<br><input type="checkbox"/> Not sure | <input checked="" type="checkbox"/> TSCC<br><input type="checkbox"/> Normal muscle tissue<br><input type="checkbox"/> Not sure |
|  | <input type="checkbox"/> TSCC<br><input checked="" type="checkbox"/> Normal muscle tissue<br><input type="checkbox"/> Not sure | <input type="checkbox"/> TSCC<br><input checked="" type="checkbox"/> Normal muscle tissue<br><input type="checkbox"/> Not sure | <input type="checkbox"/> TSCC<br><input checked="" type="checkbox"/> Normal muscle tissue<br><input type="checkbox"/> Not sure |
|  | <input checked="" type="checkbox"/> TSCC<br><input type="checkbox"/> Normal muscle tissue<br><input type="checkbox"/> Not sure | <input checked="" type="checkbox"/> TSCC<br><input type="checkbox"/> Normal muscle tissue<br><input type="checkbox"/> Not sure | <input checked="" type="checkbox"/> TSCC<br><input type="checkbox"/> Normal muscle tissue<br><input type="checkbox"/> Not sure |
|  | <input type="checkbox"/> TSCC<br><input checked="" type="checkbox"/> Normal muscle tissue<br><input type="checkbox"/> Not sure | <input type="checkbox"/> TSCC<br><input checked="" type="checkbox"/> Normal muscle tissue<br><input type="checkbox"/> Not sure | <input type="checkbox"/> TSCC<br><input checked="" type="checkbox"/> Normal muscle tissue<br><input type="checkbox"/> Not sure |

Normal Sample #10

| Generated H&E images                                                                | Pathologist #1                                                                                                                 | Pathologist #2                                                                                                                 | Pathologist #3                                                                                                                 |
|-------------------------------------------------------------------------------------|--------------------------------------------------------------------------------------------------------------------------------|--------------------------------------------------------------------------------------------------------------------------------|--------------------------------------------------------------------------------------------------------------------------------|
| 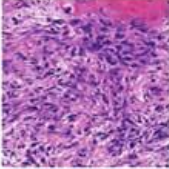   | <input checked="" type="checkbox"/> TSCC<br><input type="checkbox"/> Normal muscle tissue<br><input type="checkbox"/> Not sure | <input checked="" type="checkbox"/> TSCC<br><input type="checkbox"/> Normal muscle tissue<br><input type="checkbox"/> Not sure | <input checked="" type="checkbox"/> TSCC<br><input type="checkbox"/> Normal muscle tissue<br><input type="checkbox"/> Not sure |
|    | <input checked="" type="checkbox"/> TSCC<br><input type="checkbox"/> Normal muscle tissue<br><input type="checkbox"/> Not sure | <input checked="" type="checkbox"/> TSCC<br><input type="checkbox"/> Normal muscle tissue<br><input type="checkbox"/> Not sure | <input checked="" type="checkbox"/> TSCC<br><input type="checkbox"/> Normal muscle tissue<br><input type="checkbox"/> Not sure |
|    | <input type="checkbox"/> TSCC<br><input checked="" type="checkbox"/> Normal muscle tissue<br><input type="checkbox"/> Not sure | <input type="checkbox"/> TSCC<br><input checked="" type="checkbox"/> Normal muscle tissue<br><input type="checkbox"/> Not sure | <input type="checkbox"/> TSCC<br><input checked="" type="checkbox"/> Normal muscle tissue<br><input type="checkbox"/> Not sure |
|   | <input type="checkbox"/> TSCC<br><input checked="" type="checkbox"/> Normal muscle tissue<br><input type="checkbox"/> Not sure | <input type="checkbox"/> TSCC<br><input checked="" type="checkbox"/> Normal muscle tissue<br><input type="checkbox"/> Not sure | <input type="checkbox"/> TSCC<br><input checked="" type="checkbox"/> Normal muscle tissue<br><input type="checkbox"/> Not sure |
|  | <input type="checkbox"/> TSCC<br><input checked="" type="checkbox"/> Normal muscle tissue<br><input type="checkbox"/> Not sure | <input type="checkbox"/> TSCC<br><input checked="" type="checkbox"/> Normal muscle tissue<br><input type="checkbox"/> Not sure | <input type="checkbox"/> TSCC<br><input checked="" type="checkbox"/> Normal muscle tissue<br><input type="checkbox"/> Not sure |
|  | <input type="checkbox"/> TSCC<br><input checked="" type="checkbox"/> Normal muscle tissue<br><input type="checkbox"/> Not sure | <input type="checkbox"/> TSCC<br><input checked="" type="checkbox"/> Normal muscle tissue<br><input type="checkbox"/> Not sure | <input type="checkbox"/> TSCC<br><input checked="" type="checkbox"/> Normal muscle tissue<br><input type="checkbox"/> Not sure |
|  | <input type="checkbox"/> TSCC<br><input checked="" type="checkbox"/> Normal muscle tissue<br><input type="checkbox"/> Not sure | <input type="checkbox"/> TSCC<br><input checked="" type="checkbox"/> Normal muscle tissue<br><input type="checkbox"/> Not sure | <input type="checkbox"/> TSCC<br><input checked="" type="checkbox"/> Normal muscle tissue<br><input type="checkbox"/> Not sure |
|  | <input type="checkbox"/> TSCC<br><input checked="" type="checkbox"/> Normal muscle tissue<br><input type="checkbox"/> Not sure | <input type="checkbox"/> TSCC<br><input checked="" type="checkbox"/> Normal muscle tissue<br><input type="checkbox"/> Not sure | <input type="checkbox"/> TSCC<br><input checked="" type="checkbox"/> Normal muscle tissue<br><input type="checkbox"/> Not sure |

### Normal Sample #11

| Generated H&E images                                                                | Pathologist #1                                                                                                                 | Pathologist #2                                                                                                                 | Pathologist #3                                                                                                                 |
|-------------------------------------------------------------------------------------|--------------------------------------------------------------------------------------------------------------------------------|--------------------------------------------------------------------------------------------------------------------------------|--------------------------------------------------------------------------------------------------------------------------------|
|    | <input type="checkbox"/> TSCC<br><input checked="" type="checkbox"/> Normal muscle tissue<br><input type="checkbox"/> Not sure | <input type="checkbox"/> TSCC<br><input checked="" type="checkbox"/> Normal muscle tissue<br><input type="checkbox"/> Not sure | <input type="checkbox"/> TSCC<br><input checked="" type="checkbox"/> Normal muscle tissue<br><input type="checkbox"/> Not sure |
|    | <input type="checkbox"/> TSCC<br><input checked="" type="checkbox"/> Normal muscle tissue<br><input type="checkbox"/> Not sure | <input type="checkbox"/> TSCC<br><input checked="" type="checkbox"/> Normal muscle tissue<br><input type="checkbox"/> Not sure | <input type="checkbox"/> TSCC<br><input checked="" type="checkbox"/> Normal muscle tissue<br><input type="checkbox"/> Not sure |
|    | <input type="checkbox"/> TSCC<br><input checked="" type="checkbox"/> Normal muscle tissue<br><input type="checkbox"/> Not sure | <input type="checkbox"/> TSCC<br><input checked="" type="checkbox"/> Normal muscle tissue<br><input type="checkbox"/> Not sure | <input type="checkbox"/> TSCC<br><input checked="" type="checkbox"/> Normal muscle tissue<br><input type="checkbox"/> Not sure |
|   | <input type="checkbox"/> TSCC<br><input checked="" type="checkbox"/> Normal muscle tissue<br><input type="checkbox"/> Not sure | <input type="checkbox"/> TSCC<br><input checked="" type="checkbox"/> Normal muscle tissue<br><input type="checkbox"/> Not sure | <input type="checkbox"/> TSCC<br><input checked="" type="checkbox"/> Normal muscle tissue<br><input type="checkbox"/> Not sure |
|  | <input type="checkbox"/> TSCC<br><input checked="" type="checkbox"/> Normal muscle tissue<br><input type="checkbox"/> Not sure | <input type="checkbox"/> TSCC<br><input checked="" type="checkbox"/> Normal muscle tissue<br><input type="checkbox"/> Not sure | <input type="checkbox"/> TSCC<br><input checked="" type="checkbox"/> Normal muscle tissue<br><input type="checkbox"/> Not sure |
|  | <input type="checkbox"/> TSCC<br><input checked="" type="checkbox"/> Normal muscle tissue<br><input type="checkbox"/> Not sure | <input type="checkbox"/> TSCC<br><input checked="" type="checkbox"/> Normal muscle tissue<br><input type="checkbox"/> Not sure | <input type="checkbox"/> TSCC<br><input checked="" type="checkbox"/> Normal muscle tissue<br><input type="checkbox"/> Not sure |
|  | <input type="checkbox"/> TSCC<br><input checked="" type="checkbox"/> Normal muscle tissue<br><input type="checkbox"/> Not sure | <input type="checkbox"/> TSCC<br><input checked="" type="checkbox"/> Normal muscle tissue<br><input type="checkbox"/> Not sure | <input type="checkbox"/> TSCC<br><input checked="" type="checkbox"/> Normal muscle tissue<br><input type="checkbox"/> Not sure |
|  | <input type="checkbox"/> TSCC<br><input checked="" type="checkbox"/> Normal muscle tissue<br><input type="checkbox"/> Not sure | <input type="checkbox"/> TSCC<br><input checked="" type="checkbox"/> Normal muscle tissue<br><input type="checkbox"/> Not sure | <input type="checkbox"/> TSCC<br><input checked="" type="checkbox"/> Normal muscle tissue<br><input type="checkbox"/> Not sure |



### Normal Sample #12

| Generated H&E images                                                                | Pathologist #1                                                                                                                 | Pathologist #2                                                                                                                 | Pathologist #3                                                                                                                 |
|-------------------------------------------------------------------------------------|--------------------------------------------------------------------------------------------------------------------------------|--------------------------------------------------------------------------------------------------------------------------------|--------------------------------------------------------------------------------------------------------------------------------|
| 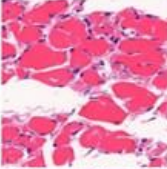   | <input type="checkbox"/> TSCC<br><input checked="" type="checkbox"/> Normal muscle tissue<br><input type="checkbox"/> Not sure | <input type="checkbox"/> TSCC<br><input checked="" type="checkbox"/> Normal muscle tissue<br><input type="checkbox"/> Not sure | <input type="checkbox"/> TSCC<br><input checked="" type="checkbox"/> Normal muscle tissue<br><input type="checkbox"/> Not sure |
|    | <input checked="" type="checkbox"/> TSCC<br><input type="checkbox"/> Normal muscle tissue<br><input type="checkbox"/> Not sure | <input type="checkbox"/> TSCC<br><input type="checkbox"/> Normal muscle tissue<br><input checked="" type="checkbox"/> Not sure | <input checked="" type="checkbox"/> TSCC<br><input type="checkbox"/> Normal muscle tissue<br><input type="checkbox"/> Not sure |
|    | <input type="checkbox"/> TSCC<br><input checked="" type="checkbox"/> Normal muscle tissue<br><input type="checkbox"/> Not sure | <input type="checkbox"/> TSCC<br><input checked="" type="checkbox"/> Normal muscle tissue<br><input type="checkbox"/> Not sure | <input type="checkbox"/> TSCC<br><input checked="" type="checkbox"/> Normal muscle tissue<br><input type="checkbox"/> Not sure |
|   | <input type="checkbox"/> TSCC<br><input checked="" type="checkbox"/> Normal muscle tissue<br><input type="checkbox"/> Not sure | <input type="checkbox"/> TSCC<br><input checked="" type="checkbox"/> Normal muscle tissue<br><input type="checkbox"/> Not sure | <input type="checkbox"/> TSCC<br><input checked="" type="checkbox"/> Normal muscle tissue<br><input type="checkbox"/> Not sure |
|  | <input checked="" type="checkbox"/> TSCC<br><input type="checkbox"/> Normal muscle tissue<br><input type="checkbox"/> Not sure | <input type="checkbox"/> TSCC<br><input type="checkbox"/> Normal muscle tissue<br><input checked="" type="checkbox"/> Not sure | <input checked="" type="checkbox"/> TSCC<br><input type="checkbox"/> Normal muscle tissue<br><input type="checkbox"/> Not sure |
|  | <input checked="" type="checkbox"/> TSCC<br><input type="checkbox"/> Normal muscle tissue<br><input type="checkbox"/> Not sure | <input type="checkbox"/> TSCC<br><input type="checkbox"/> Normal muscle tissue<br><input checked="" type="checkbox"/> Not sure | <input checked="" type="checkbox"/> TSCC<br><input type="checkbox"/> Normal muscle tissue<br><input type="checkbox"/> Not sure |
|  | <input checked="" type="checkbox"/> TSCC<br><input type="checkbox"/> Normal muscle tissue<br><input type="checkbox"/> Not sure | <input checked="" type="checkbox"/> TSCC<br><input type="checkbox"/> Normal muscle tissue<br><input type="checkbox"/> Not sure | <input checked="" type="checkbox"/> TSCC<br><input type="checkbox"/> Normal muscle tissue<br><input type="checkbox"/> Not sure |
|  | <input checked="" type="checkbox"/> TSCC<br><input type="checkbox"/> Normal muscle tissue<br><input type="checkbox"/> Not sure | <input checked="" type="checkbox"/> TSCC<br><input type="checkbox"/> Normal muscle tissue<br><input type="checkbox"/> Not sure | <input checked="" type="checkbox"/> TSCC<br><input type="checkbox"/> Normal muscle tissue<br><input type="checkbox"/> Not sure |

### Normal Sample #13

| Generated H&E images                                                                | Pathologist #1                                                                                                                 | Pathologist #2                                                                                                                 | Pathologist #3                                                                                                                 |
|-------------------------------------------------------------------------------------|--------------------------------------------------------------------------------------------------------------------------------|--------------------------------------------------------------------------------------------------------------------------------|--------------------------------------------------------------------------------------------------------------------------------|
|    | <input type="checkbox"/> TSCC<br><input checked="" type="checkbox"/> Normal muscle tissue<br><input type="checkbox"/> Not sure | <input type="checkbox"/> TSCC<br><input checked="" type="checkbox"/> Normal muscle tissue<br><input type="checkbox"/> Not sure | <input type="checkbox"/> TSCC<br><input checked="" type="checkbox"/> Normal muscle tissue<br><input type="checkbox"/> Not sure |
|    | <input type="checkbox"/> TSCC<br><input checked="" type="checkbox"/> Normal muscle tissue<br><input type="checkbox"/> Not sure | <input type="checkbox"/> TSCC<br><input checked="" type="checkbox"/> Normal muscle tissue<br><input type="checkbox"/> Not sure | <input type="checkbox"/> TSCC<br><input checked="" type="checkbox"/> Normal muscle tissue<br><input type="checkbox"/> Not sure |
|    | <input type="checkbox"/> TSCC<br><input checked="" type="checkbox"/> Normal muscle tissue<br><input type="checkbox"/> Not sure | <input type="checkbox"/> TSCC<br><input checked="" type="checkbox"/> Normal muscle tissue<br><input type="checkbox"/> Not sure | <input type="checkbox"/> TSCC<br><input checked="" type="checkbox"/> Normal muscle tissue<br><input type="checkbox"/> Not sure |
|   | <input type="checkbox"/> TSCC<br><input checked="" type="checkbox"/> Normal muscle tissue<br><input type="checkbox"/> Not sure | <input type="checkbox"/> TSCC<br><input checked="" type="checkbox"/> Normal muscle tissue<br><input type="checkbox"/> Not sure | <input type="checkbox"/> TSCC<br><input checked="" type="checkbox"/> Normal muscle tissue<br><input type="checkbox"/> Not sure |
|  | <input checked="" type="checkbox"/> TSCC<br><input type="checkbox"/> Normal muscle tissue<br><input type="checkbox"/> Not sure | <input type="checkbox"/> TSCC<br><input type="checkbox"/> Normal muscle tissue<br><input checked="" type="checkbox"/> Not sure | <input checked="" type="checkbox"/> TSCC<br><input type="checkbox"/> Normal muscle tissue<br><input type="checkbox"/> Not sure |
|  | <input type="checkbox"/> TSCC<br><input checked="" type="checkbox"/> Normal muscle tissue<br><input type="checkbox"/> Not sure | <input type="checkbox"/> TSCC<br><input checked="" type="checkbox"/> Normal muscle tissue<br><input type="checkbox"/> Not sure | <input type="checkbox"/> TSCC<br><input checked="" type="checkbox"/> Normal muscle tissue<br><input type="checkbox"/> Not sure |
|  | <input type="checkbox"/> TSCC<br><input checked="" type="checkbox"/> Normal muscle tissue<br><input type="checkbox"/> Not sure | <input type="checkbox"/> TSCC<br><input type="checkbox"/> Normal muscle tissue<br><input checked="" type="checkbox"/> Not sure | <input type="checkbox"/> TSCC<br><input checked="" type="checkbox"/> Normal muscle tissue<br><input type="checkbox"/> Not sure |
|  | <input type="checkbox"/> TSCC<br><input checked="" type="checkbox"/> Normal muscle tissue<br><input type="checkbox"/> Not sure | <input type="checkbox"/> TSCC<br><input checked="" type="checkbox"/> Normal muscle tissue<br><input type="checkbox"/> Not sure | <input type="checkbox"/> TSCC<br><input checked="" type="checkbox"/> Normal muscle tissue<br><input type="checkbox"/> Not sure |



### Normal Sample #14

| Generated H&E images                                                                | Pathologist #1                                                                                                                 | Pathologist #2                                                                                                                 | Pathologist #3                                                                                                                 |
|-------------------------------------------------------------------------------------|--------------------------------------------------------------------------------------------------------------------------------|--------------------------------------------------------------------------------------------------------------------------------|--------------------------------------------------------------------------------------------------------------------------------|
| 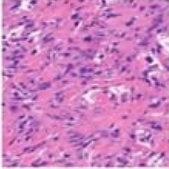   | <input checked="" type="checkbox"/> TSCC<br><input type="checkbox"/> Normal muscle tissue<br><input type="checkbox"/> Not sure | <input type="checkbox"/> TSCC<br><input type="checkbox"/> Normal muscle tissue<br><input checked="" type="checkbox"/> Not sure | <input checked="" type="checkbox"/> TSCC<br><input type="checkbox"/> Normal muscle tissue<br><input type="checkbox"/> Not sure |
|    | <input type="checkbox"/> TSCC<br><input checked="" type="checkbox"/> Normal muscle tissue<br><input type="checkbox"/> Not sure | <input type="checkbox"/> TSCC<br><input checked="" type="checkbox"/> Normal muscle tissue<br><input type="checkbox"/> Not sure | <input type="checkbox"/> TSCC<br><input checked="" type="checkbox"/> Normal muscle tissue<br><input type="checkbox"/> Not sure |
|    | <input checked="" type="checkbox"/> TSCC<br><input type="checkbox"/> Normal muscle tissue<br><input type="checkbox"/> Not sure | <input type="checkbox"/> TSCC<br><input type="checkbox"/> Normal muscle tissue<br><input checked="" type="checkbox"/> Not sure | <input checked="" type="checkbox"/> TSCC<br><input type="checkbox"/> Normal muscle tissue<br><input type="checkbox"/> Not sure |
|   | <input checked="" type="checkbox"/> TSCC<br><input type="checkbox"/> Normal muscle tissue<br><input type="checkbox"/> Not sure | <input checked="" type="checkbox"/> TSCC<br><input type="checkbox"/> Normal muscle tissue<br><input type="checkbox"/> Not sure | <input checked="" type="checkbox"/> TSCC<br><input type="checkbox"/> Normal muscle tissue<br><input type="checkbox"/> Not sure |
|  | <input checked="" type="checkbox"/> TSCC<br><input type="checkbox"/> Normal muscle tissue<br><input type="checkbox"/> Not sure | <input checked="" type="checkbox"/> TSCC<br><input type="checkbox"/> Normal muscle tissue<br><input type="checkbox"/> Not sure | <input checked="" type="checkbox"/> TSCC<br><input type="checkbox"/> Normal muscle tissue<br><input type="checkbox"/> Not sure |
|  | <input type="checkbox"/> TSCC<br><input checked="" type="checkbox"/> Normal muscle tissue<br><input type="checkbox"/> Not sure | <input type="checkbox"/> TSCC<br><input checked="" type="checkbox"/> Normal muscle tissue<br><input type="checkbox"/> Not sure | <input type="checkbox"/> TSCC<br><input checked="" type="checkbox"/> Normal muscle tissue<br><input type="checkbox"/> Not sure |
|  | <input checked="" type="checkbox"/> TSCC<br><input type="checkbox"/> Normal muscle tissue<br><input type="checkbox"/> Not sure | <input type="checkbox"/> TSCC<br><input type="checkbox"/> Normal muscle tissue<br><input checked="" type="checkbox"/> Not sure | <input checked="" type="checkbox"/> TSCC<br><input type="checkbox"/> Normal muscle tissue<br><input type="checkbox"/> Not sure |
|  | <input type="checkbox"/> TSCC<br><input checked="" type="checkbox"/> Normal muscle tissue<br><input type="checkbox"/> Not sure | <input type="checkbox"/> TSCC<br><input checked="" type="checkbox"/> Normal muscle tissue<br><input type="checkbox"/> Not sure | <input type="checkbox"/> TSCC<br><input checked="" type="checkbox"/> Normal muscle tissue<br><input type="checkbox"/> Not sure |

Normal Sample #15

| Generated H&E images                                                                | Pathologist #1                                                                                                                 | Pathologist #2                                                                                                                 | Pathologist #3                                                                                                                 |
|-------------------------------------------------------------------------------------|--------------------------------------------------------------------------------------------------------------------------------|--------------------------------------------------------------------------------------------------------------------------------|--------------------------------------------------------------------------------------------------------------------------------|
| 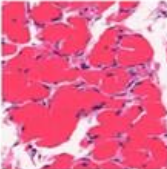   | <input type="checkbox"/> TSCC<br><input checked="" type="checkbox"/> Normal muscle tissue<br><input type="checkbox"/> Not sure | <input type="checkbox"/> TSCC<br><input checked="" type="checkbox"/> Normal muscle tissue<br><input type="checkbox"/> Not sure | <input type="checkbox"/> TSCC<br><input checked="" type="checkbox"/> Normal muscle tissue<br><input type="checkbox"/> Not sure |
|    | <input type="checkbox"/> TSCC<br><input checked="" type="checkbox"/> Normal muscle tissue<br><input type="checkbox"/> Not sure | <input type="checkbox"/> TSCC<br><input checked="" type="checkbox"/> Normal muscle tissue<br><input type="checkbox"/> Not sure | <input type="checkbox"/> TSCC<br><input checked="" type="checkbox"/> Normal muscle tissue<br><input type="checkbox"/> Not sure |
|    | <input type="checkbox"/> TSCC<br><input checked="" type="checkbox"/> Normal muscle tissue<br><input type="checkbox"/> Not sure | <input type="checkbox"/> TSCC<br><input checked="" type="checkbox"/> Normal muscle tissue<br><input type="checkbox"/> Not sure | <input type="checkbox"/> TSCC<br><input checked="" type="checkbox"/> Normal muscle tissue<br><input type="checkbox"/> Not sure |
|   | <input type="checkbox"/> TSCC<br><input checked="" type="checkbox"/> Normal muscle tissue<br><input type="checkbox"/> Not sure | <input type="checkbox"/> TSCC<br><input checked="" type="checkbox"/> Normal muscle tissue<br><input type="checkbox"/> Not sure | <input type="checkbox"/> TSCC<br><input checked="" type="checkbox"/> Normal muscle tissue<br><input type="checkbox"/> Not sure |
|  | <input type="checkbox"/> TSCC<br><input checked="" type="checkbox"/> Normal muscle tissue<br><input type="checkbox"/> Not sure | <input type="checkbox"/> TSCC<br><input checked="" type="checkbox"/> Normal muscle tissue<br><input type="checkbox"/> Not sure | <input type="checkbox"/> TSCC<br><input checked="" type="checkbox"/> Normal muscle tissue<br><input type="checkbox"/> Not sure |
|  | <input type="checkbox"/> TSCC<br><input checked="" type="checkbox"/> Normal muscle tissue<br><input type="checkbox"/> Not sure | <input type="checkbox"/> TSCC<br><input type="checkbox"/> Normal muscle tissue<br><input checked="" type="checkbox"/> Not sure | <input type="checkbox"/> TSCC<br><input checked="" type="checkbox"/> Normal muscle tissue<br><input type="checkbox"/> Not sure |
|  | <input checked="" type="checkbox"/> TSCC<br><input type="checkbox"/> Normal muscle tissue<br><input type="checkbox"/> Not sure | <input checked="" type="checkbox"/> TSCC<br><input type="checkbox"/> Normal muscle tissue<br><input type="checkbox"/> Not sure | <input checked="" type="checkbox"/> TSCC<br><input type="checkbox"/> Normal muscle tissue<br><input type="checkbox"/> Not sure |
|  | <input type="checkbox"/> TSCC<br><input checked="" type="checkbox"/> Normal muscle tissue<br><input type="checkbox"/> Not sure | <input type="checkbox"/> TSCC<br><input checked="" type="checkbox"/> Normal muscle tissue<br><input type="checkbox"/> Not sure | <input type="checkbox"/> TSCC<br><input checked="" type="checkbox"/> Normal muscle tissue<br><input type="checkbox"/> Not sure |

**Supplementary Table 3** Comparison of Model Performance in Classifying Raman Images on the Independent Test Set

| Models    | Pre-trained | TP | FP | FN | TN | ACC           | F1            | Recall        | Precision     | MCC           |
|-----------|-------------|----|----|----|----|---------------|---------------|---------------|---------------|---------------|
| ResNet18  | Yes         | 9  | 15 | 8  | 16 | 0.5208        | 0.5208        | 0.5208        | 0.5208        | 0.0436        |
|           | No          | 0  | 24 | 1  | 23 | 0.4792        | 0.4792        | 0.4792        | 0.4792        | -0.1459       |
| ResNet34  | Yes         | 23 | 1  | 19 | 5  | 0.5833        | 0.5833        | 0.5833        | 0.5833        | 0.2520        |
|           | No          | 15 | 9  | 13 | 11 | 0.5417        | 0.5417        | 0.5417        | 0.5417        | 0.0845        |
| ResNet50  | Yes         | 20 | 4  | 11 | 13 | 0.6875        | 0.6875        | 0.6875        | 0.6875        | 0.3920        |
|           | No          | 0  | 24 | 0  | 24 | 0.5000        | 0.5000        | 0.5000        | 0.5000        | 0.0000        |
| ResNet101 | Yes         | 19 | 5  | 12 | 12 | 0.6458        | 0.6458        | 0.6458        | 0.6458        | 0.3049        |
|           | No          | 14 | 10 | 10 | 14 | 0.5833        | 0.5833        | 0.5833        | 0.5833        | 0.1667        |
| ResNet152 | Yes         | 14 | 10 | 6  | 18 | 0.6667        | 0.6667        | 0.6667        | 0.6667        | 0.3381        |
|           | No          | 1  | 23 | 1  | 23 | 0.5000        | 0.5000        | 0.5000        | 0.5000        | 0.0000        |
| Our model |             | 20 | 4  | 6  | 18 | <b>0.7916</b> | <b>0.8000</b> | <b>0.8333</b> | <b>0.7692</b> | <b>0.5854</b> |

**Supplementary Table 4** The sample wise FID scores with different feature dimensions and independent manual review voting results

| Label  | Sample Number | FID Score from different feature dimensions |       |      |        | Independent Manual Review |      |           |
|--------|---------------|---------------------------------------------|-------|------|--------|---------------------------|------|-----------|
|        |               | 64                                          | 192   | 768  | 2048   | Normal                    | TSCC | Uncertain |
| Normal | 1             | 8.11                                        | 25.26 | 1.14 | 319.48 | 0                         | 22   | 2         |
|        | 2             | 6.47                                        | 22.08 | 1.18 | 327.55 | 20                        | 2    | 2         |
|        | 3             | 6.93                                        | 22.62 | 1.00 | 293.33 | 21                        | 2    | 1         |
|        | 4             | 7.16                                        | 25.84 | 1.08 | 300.80 | 24                        | 0    | 0         |
|        | 5             | 11.49                                       | 48.63 | 1.12 | 304.73 | 24                        | 0    | 0         |
|        | 6             | 15.49                                       | 52.97 | 1.20 | 436.05 | 24                        | 0    | 0         |
|        | 7             | 6.75                                        | 25.93 | 0.95 | 313.02 | 21                        | 2    | 1         |
|        | 8             | 7.65                                        | 26.84 | 0.96 | 283.96 | 21                        | 3    | 0         |
|        | 9             | 18.24                                       | 63.61 | 1.43 | 365.93 | 15                        | 9    | 0         |
|        | 10            | 12.91                                       | 42.52 | 1.12 | 307.43 | 18                        | 6    | 0         |
|        | 11            | 6.93                                        | 25.85 | 0.84 | 263.06 | 24                        | 0    | 0         |
|        | 12            | 20.23                                       | 61.97 | 1.34 | 354.84 | 9                         | 12   | 3         |
|        | 13            | 9.07                                        | 32.88 | 1.04 | 306.38 | 20                        | 2    | 2         |
|        | 14            | 14.49                                       | 43.19 | 1.62 | 417.08 | 9                         | 12   | 3         |
|        | 15            | 13.41                                       | 43.17 | 1.34 | 308.45 | 20                        | 3    | 1         |
| TSCC   | 1             | 15.02                                       | 39.44 | 0.78 | 161.31 | 5                         | 18   | 1         |
|        | 2             | 21.41                                       | 51.02 | 0.86 | 200.57 | 6                         | 18   | 0         |
|        | 3             | 12.18                                       | 31.19 | 1.12 | 272.98 | 3                         | 20   | 1         |
|        | 4             | 16.57                                       | 43.12 | 1.19 | 230.54 | 6                         | 18   | 0         |
|        | 5             | 14.40                                       | 36.20 | 0.96 | 222.60 | 3                         | 19   | 2         |
|        | 6             | 7.14                                        | 22.98 | 1.28 | 344.67 | 0                         | 23   | 1         |
|        | 7             | 27.50                                       | 57.58 | 1.45 | 306.80 | 12                        | 11   | 1         |
|        | 8             | 17.10                                       | 42.17 | 0.95 | 165.27 | 0                         | 23   | 1         |

|  |    |       |       |      |        |    |    |   |
|--|----|-------|-------|------|--------|----|----|---|
|  | 9  | 17.26 | 39.42 | 1.12 | 189.87 | 3  | 21 | 0 |
|  | 10 | 15.67 | 36.69 | 0.83 | 146.50 | 0  | 22 | 2 |
|  | 11 | 11.82 | 31.02 | 1.21 | 236.70 | 0  | 24 | 0 |
|  | 12 | 16.00 | 38.24 | 0.95 | 206.90 | 0  | 23 | 1 |
|  | 13 | 20.70 | 67.08 | 1.15 | 233.09 | 0  | 21 | 3 |
|  | 14 | 20.30 | 50.35 | 1.37 | 285.34 | 13 | 7  | 4 |
|  | 15 | 13.58 | 38.66 | 1.45 | 302.20 | 0  | 23 | 1 |
